# Supplementary material for: Using an integrative taxonomic approach to delimit a sibling species, Mycetomoellerius mikromelanos sp. nov. (Formicidae: Attini: Attina)
Source: PeerJ. 2021 Jun 24;9:e11622. doi: 10.7717/peerj.11622 (PMC8236233; doi:10.7717/peerj.11622)
Supplement: Supplemental Information 22 [file peerj-09-11622-s022.xlsx]

## Sheet: BR Raw Data
Time	CRC170519-01 Trial 1	CRC170519-01 Trial 2	CRC170519-01 Trial 3	CRC170519-01 Trial 4	CRC170519-01 Trial 5	CRC170519-03 Trial 1	CRC170519-03 Trial 2	CRC170519-03 Trial 3	CRC170519-03 Trial 4	CRC170519-03 Trial 5	MS170505-01 Trial 1	MS170505-01 Trial 2	MS170505-01 Trial 3	MS170505-01 Trial 4	MS170505-01 Trial 5	RMMA100629-15 Trial 1	RMMA100629-15 Trial 2	RMMA100629-15 Trial 3	RMMA100629-15 Trial 4	RMMA100629-15 Trial 5
0	Start Trial	Start Trial	Start Trial	Start Trial	Start Trial	Start Trial	Start Trial	Start Trial	Start Trial	Start Trial	Start Trial	Start Trial	Start Trial	Start Trial	Start Trial	Start Trial	Start Trial	Start Trial	Start Trial	Start Trial
0.2											Exit Refuge
0.4
0.6
0.8						Exit Refuge					1
1						1								Exit Refuge
1.2						1													Exit Refuge
1.4														1					1
1.6																Exit Refuge
1.8						1
2					Exit Refuge				Exit Refuge					1
2.2								Exit Refuge
2.4					1
2.6			Exit Refuge			1			1
2.8									1
3			1						1
3.2									1								Exit Refuge
3.4			1						1			Exit Refuge				1
3.6					1									1
3.8								1								1			1
4
4.2					1											1	1
4.4						1			1								1		1
4.6
4.8									1						Exit Refuge
5															1
5.2																			1
5.4						1									1
5.6																1			1
5.8											1	1
6								1											1
6.2						1							Exit Refuge
6.4													1
6.6
6.8																			1
7						1
7.2
7.4											1
7.6												1				1
7.8									1
8			1					Under Refuge								1
8.2								Under Refuge
8.4					1			Under Refuge
8.6								Under Refuge
8.8						1		Under Refuge
9								Under Refuge	1
9.2								Under Refuge
9.4								Under Refuge
9.6								Under Refuge
9.8								Under Refuge
10								Under Refuge
10.2								Under Refuge
10.4								Under Refuge				1	1
10.6						1		Under Refuge
10.8								Under Refuge				1
11					1			Under Refuge
11.2							Exit Refuge	Under Refuge
11.4						1		Under Refuge
11.6			1			1		1	1
11.8
12									1
12.2					1		1								1
12.4
12.6
12.8			1																1
13						1			1						1
13.2
13.4														1
13.6								Under Refuge					1
13.8					1	1		Under Refuge	1
14			1					Under Refuge
14.2								1				1							1
14.4
14.6			1										1
14.8															1
15						1	1
15.2
15.4			1													1		Exit Refuge
15.6					1
15.8
16										Exit Refuge								1
16.2			1					1
16.4														1
16.6			1					Under Refuge
16.8					1			Under Refuge				1						1
17							1	Under Refuge	1					1
17.2								Under Refuge	1							1
17.4								Under Refuge
17.6								Under Refuge
17.8								Under Refuge				1			1
18								Under Refuge
18.2							1	Under Refuge
18.4							1	Under Refuge
18.6								Under Refuge	1						1			1
18.8					1			Under Refuge		1
19								Under Refuge							1
19.2								Under Refuge				1
19.4								Under Refuge
19.6								Under Refuge		Under Refuge
19.8							1	Under Refuge		Under Refuge
20								Under Refuge		Under Refuge								1
20.2			1					Under Refuge	1	Under Refuge
20.4								Under Refuge		Under Refuge
20.6							1	Under Refuge		Under Refuge				1
20.8					1			Under Refuge		Under Refuge		1
21								Under Refuge	1	Under Refuge
21.2					1			Under Refuge		Under Refuge		1	1
21.4								Under Refuge		Under Refuge
21.6								Under Refuge		Under Refuge
21.8			1				1	Under Refuge		Under Refuge
22								Under Refuge		Under Refuge
22.2					1			Under Refuge		Under Refuge				1		1
22.4								Under Refuge		Under Refuge
22.6						1		Under Refuge	1	Under Refuge
22.8			1		1			Under Refuge		Under Refuge									1
23								Under Refuge		Under Refuge
23.2								Under Refuge		Under Refuge								1
23.4								Under Refuge		Under Refuge
23.6							1	Under Refuge		Under Refuge					1
23.8						1		Under Refuge		Under Refuge
24								Under Refuge		Under Refuge
24.2								Under Refuge		Under Refuge						1
24.4								Under Refuge		Under Refuge								1
24.6							1	Under Refuge		Under Refuge
24.8					1			Under Refuge		Under Refuge					1
25								Under Refuge		Under Refuge			1
25.2								Under Refuge		Under Refuge
25.4			1					Under Refuge		Under Refuge		1		1
25.6								Under Refuge		Under Refuge
25.8								Under Refuge		Under Refuge
26			1					Under Refuge		Under Refuge
26.2								Under Refuge		Under Refuge								1
26.4					1			Under Refuge		Under Refuge		1			1				1
26.6							1	Under Refuge		Under Refuge						1
26.8			1					Under Refuge		Under Refuge					1
27								Under Refuge		Under Refuge
27.2								Under Refuge		Under Refuge								1
27.4								Under Refuge		Under Refuge
27.6								Under Refuge		Under Refuge					1
27.8										Under Refuge
28		Exit Refuge								Under Refuge
28.2	Exit Refuge		1		1			1		Under Refuge
28.4	1									Under Refuge								1
28.6					1		1			Under Refuge
28.8			1			1				Under Refuge
29		1								Under Refuge					1
29.2		1								Under Refuge
29.4									1	Under Refuge
29.6					1					Under Refuge	1
29.8										Under Refuge			1	1
30	1							Under Refuge		Under Refuge		1
30.2								Under Refuge		Under Refuge									1
30.4								Under Refuge	1	Under Refuge
30.6							1	Under Refuge		Under Refuge				1
30.8		1			Under Refuge			Under Refuge		Under Refuge			1
31					Under Refuge			Under Refuge	1	Under Refuge
31.2					Under Refuge			Under Refuge		Under Refuge					1
31.4					Under Refuge			Under Refuge		Under Refuge		1
31.6					Under Refuge	1	1	Under Refuge		Under Refuge
31.8					Under Refuge	1		Under Refuge		Under Refuge								1
32					Under Refuge		1	Under Refuge	1	Under Refuge					1
32.2	1				Under Refuge			Under Refuge		Under Refuge
32.4					Under Refuge			Under Refuge		Under Refuge
32.6		1			Under Refuge			Under Refuge		Under Refuge
32.8					Under Refuge		1	Under Refuge		Under Refuge								1
33					1			Under Refuge		Under Refuge			1
33.2							1	Under Refuge	1	Under Refuge
33.4					1			Under Refuge		Under Refuge
33.6	1						1	Under Refuge		Under Refuge			1		1
33.8								Under Refuge		Under Refuge						1
34			1				1	Under Refuge		Under Refuge
34.2		1						Under Refuge	1	Under Refuge			1
34.4					1	Under Refuge		Under Refuge		Under Refuge
34.6						Under Refuge		Under Refuge		Under Refuge		1
34.8						Under Refuge	1	Under Refuge		Under Refuge					1			1
35			1			Under Refuge		Under Refuge		Under Refuge				1
35.2	1					Under Refuge		Under Refuge	1	Under Refuge
35.4					1	Under Refuge		Under Refuge		Under Refuge			1
35.6						Under Refuge				Under Refuge
35.8			1			Under Refuge				Under Refuge
36						Under Refuge				Under Refuge
36.2						Under Refuge		Under Refuge		Under Refuge									1
36.4			1			Under Refuge		Under Refuge		Under Refuge
36.6						Under Refuge		Under Refuge		Under Refuge			1
36.8						Under Refuge		Under Refuge		Under Refuge					1
37	1			Exit Refuge	1	Under Refuge		Under Refuge		Under Refuge		1
37.2			1			Under Refuge		Under Refuge	1	Under Refuge								1
37.4						1	1	Under Refuge		Under Refuge
37.6			1	1				Under Refuge		Under Refuge
37.8		1						Under Refuge		Under Refuge
38					1			Under Refuge		Under Refuge					1
38.2			1					Under Refuge		Under Refuge								1
38.4				1				Under Refuge		Under Refuge
38.6	1							Under Refuge		Under Refuge		1		1
38.8							1	Under Refuge		Under Refuge					1	1
39								Under Refuge		Under Refuge
39.2			1				1	Under Refuge		Under Refuge						1
39.4		1		1				Under Refuge		Under Refuge		1		1
39.6								Under Refuge		Under Refuge
39.8	1						1	Under Refuge		Under Refuge
40						1		Under Refuge		Under Refuge			1
40.2								Under Refuge		Under Refuge
40.4		1						Under Refuge		Under Refuge					1	1			1
40.6						1		1		Under Refuge		1			1	1
40.8			1		1					Under Refuge
41					1		1			Under Refuge
41.2										Under Refuge
41.4										Under Refuge					1
41.6		1	1		1	1				Under Refuge
41.8										Under Refuge
42			1	1						Under Refuge					1
42.2										Under Refuge		1				1			1
42.4		1								Under Refuge
42.6			1							Under Refuge
42.8										Under Refuge						1
43										Under Refuge
43.2		1								Under Refuge		1			1			1
43.4						1				Under Refuge			1
43.6			1	1						Under Refuge										Exit Refuge
43.8						1			1	Under Refuge					Under Refuge				1
44			1							Under Refuge				1	Under Refuge
44.2										Under Refuge					Under Refuge
44.4					1					Under Refuge					Under Refuge
44.6		1				1				Under Refuge	1				Under Refuge
44.8										Under Refuge					Under Refuge	1
45			1		1					Under Refuge		1			1
45.2	1									Under Refuge	1			1						1
45.4									1	Under Refuge									1
45.6			1							Under Refuge					1					1
45.8				1		1	1			Under Refuge
46					1	1		1		Under Refuge			1			1
46.2										Under Refuge
46.4			1						1	Under Refuge		1			1
46.6	1				Under Refuge					Under Refuge			1
46.8					Under Refuge					Under Refuge					1
47					Under Refuge					Under Refuge									1
47.2			1		1			Under Refuge		Under Refuge								1
47.4				1				Under Refuge		Under Refuge			1
47.6			1		1			Under Refuge	1	Under Refuge
47.8								Under Refuge		Under Refuge		1		1
48								Under Refuge		Under Refuge
48.2								Under Refuge		Under Refuge			1
48.4	1				1			Under Refuge		Under Refuge					1
48.6								Under Refuge		Under Refuge
48.8				1				Under Refuge		Under Refuge		1
49								Under Refuge		Under Refuge									1
49.2					1			Under Refuge	1	Under Refuge			1
49.4							1	Under Refuge		Under Refuge
49.6								Under Refuge		Under Refuge								1
49.8						1		Under Refuge		Under Refuge
50					1			Under Refuge		Under Refuge					1
50.2								Under Refuge		Under Refuge								1
50.4								Under Refuge		Under Refuge										1
50.6	1							Under Refuge	1	Under Refuge	1	1
50.8	1						1	Under Refuge		Under Refuge
51								Under Refuge		Under Refuge
51.2								Under Refuge		Under Refuge	1				1
51.4								Under Refuge		Under Refuge		1
51.6								Under Refuge		Under Refuge
51.8	1					1	1	Under Refuge		Under Refuge
52								Under Refuge		Under Refuge
52.2					1		1	Under Refuge		Under Refuge		1			1
52.4								Under Refuge		Under Refuge				1		1
52.6								Under Refuge		Under Refuge
52.8		1						Under Refuge		Under Refuge						1				Under Refuge
53						1		Under Refuge	1	Under Refuge										Under Refuge
53.2								Under Refuge		Under Refuge										Under Refuge
53.4	1						1	Under Refuge		Under Refuge					1					Under Refuge
53.6								Under Refuge		Under Refuge		1								Under Refuge
53.8							1	Under Refuge	1	Under Refuge										Under Refuge
54					1			Under Refuge		Under Refuge										Under Refuge
54.2								Under Refuge		Under Refuge										Under Refuge
54.4								Under Refuge		Under Refuge					1			1		Under Refuge
54.6					1			Under Refuge		Under Refuge										Under Refuge
54.8	1							Under Refuge		Under Refuge										Under Refuge
55				1	1	1		Under Refuge		Under Refuge										Under Refuge
55.2								Under Refuge		Under Refuge										Under Refuge
55.4							1	Under Refuge		Under Refuge										Under Refuge
55.6								Under Refuge		Under Refuge					1				1	Under Refuge
55.8								Under Refuge		Under Refuge								1		Under Refuge
56								Under Refuge		Under Refuge	1	1								Under Refuge
56.2					1			Under Refuge		Under Refuge										Under Refuge
56.4	1			1				Under Refuge		Under Refuge										Under Refuge
56.6								Under Refuge		Under Refuge					1					Under Refuge
56.8						1		Under Refuge		Under Refuge										Under Refuge
57		1						Under Refuge		Under Refuge										Under Refuge
57.2								Under Refuge		Under Refuge										Under Refuge
57.4								Under Refuge		Under Refuge					1					Under Refuge
57.6								Under Refuge		Under Refuge								1		Under Refuge
57.8								Under Refuge		Under Refuge										Under Refuge
58								Under Refuge	1	Under Refuge										Under Refuge
58.2		1						Under Refuge		Under Refuge			1							Under Refuge
58.4								Under Refuge		Under Refuge										Under Refuge
58.6								Under Refuge		Under Refuge		On Refuge								Under Refuge
58.8						1		Under Refuge		Under Refuge		On Refuge		1	1				1	Under Refuge
59	1			1				Under Refuge		Under Refuge		On Refuge								Under Refuge
59.2								Under Refuge	1	Under Refuge		On Refuge								Under Refuge
59.4					1			Under Refuge		Under Refuge		On Refuge								Under Refuge
59.6		1						Under Refuge		Under Refuge		On Refuge						1		Under Refuge
59.8			1					Under Refuge		Under Refuge		On Refuge			1				1	Under Refuge
60								Under Refuge		Under Refuge		On Refuge								Under Refuge
60.2								Under Refuge		Under Refuge		On Refuge							1	Under Refuge
60.4								Under Refuge		Under Refuge		On Refuge		1	1					Under Refuge
60.6					1			Under Refuge		Under Refuge		On Refuge								Under Refuge
60.8			1	1				Under Refuge		Under Refuge		On Refuge							1	Under Refuge
61								Under Refuge	1	Under Refuge		On Refuge			1					Under Refuge
61.2	1							Under Refuge		Under Refuge		On Refuge								Under Refuge
61.4								Under Refuge		Under Refuge		On Refuge								Under Refuge
61.6								Under Refuge		Under Refuge		On Refuge								Under Refuge
61.8					1			Under Refuge		Under Refuge		On Refuge						1		Under Refuge
62								Under Refuge		Under Refuge		On Refuge								Under Refuge
62.2			1					Under Refuge		Under Refuge		On Refuge			1					Under Refuge
62.4				1	1			Under Refuge		Under Refuge		1						1		Under Refuge
62.6								Under Refuge		Under Refuge				1						Under Refuge
62.8								Under Refuge		Under Refuge										Under Refuge
63								Under Refuge		Under Refuge					1					Under Refuge
63.2						1		Under Refuge	1	Under Refuge										Under Refuge
63.4								Under Refuge		Under Refuge										Under Refuge
63.6								Under Refuge		Under Refuge		1								Under Refuge
63.8				1	1			Under Refuge		Under Refuge					1					Under Refuge
64						1		Under Refuge		Under Refuge						1				Under Refuge
64.2							1	Under Refuge		Under Refuge								1		Under Refuge
64.4								Under Refuge		Under Refuge										Under Refuge
64.6					1			Under Refuge		Under Refuge										Under Refuge
64.8		1						Under Refuge		Under Refuge										Under Refuge
65	1					1		Under Refuge		Under Refuge		1								Under Refuge
65.2								Under Refuge		Under Refuge				1				1		Under Refuge
65.4	1							Under Refuge		Under Refuge								1		Under Refuge
65.6							1	Under Refuge		Under Refuge										Under Refuge
65.8								Under Refuge		Under Refuge		1								Under Refuge
66	1							Under Refuge		Under Refuge			1			1				Under Refuge
66.2								Under Refuge		Under Refuge										Under Refuge
66.4								Under Refuge		Under Refuge										Under Refuge
66.6				1			1	Under Refuge		Under Refuge										Under Refuge
66.8								Under Refuge		Under Refuge		1								Under Refuge
67			1		1			Under Refuge		Under Refuge										Under Refuge
67.2								Under Refuge		Under Refuge										Under Refuge
67.4	1					1		Under Refuge		Under Refuge						1			1	Under Refuge
67.6					1			1		Under Refuge										Under Refuge
67.8										Under Refuge		1		1						Under Refuge
68			1				1			Under Refuge								1		Under Refuge
68.2								1		Under Refuge										Under Refuge
68.4	1	1								Under Refuge										Under Refuge
68.6										Under Refuge										Under Refuge
68.8										Under Refuge								1		Under Refuge
69			1				1			Under Refuge									1	Under Refuge
69.2									1	Under Refuge		1								Under Refuge
69.4	1			1						Under Refuge										Under Refuge
69.6			1		1					Under Refuge					1					Under Refuge
69.8						1				Under Refuge										Under Refuge
70										Under Refuge									1	Under Refuge
70.2	1								1	Under Refuge										Under Refuge
70.4			1		1			1		Under Refuge								Under Refuge		Under Refuge
70.6		1								Under Refuge			1					Under Refuge		Under Refuge
70.8			Under Refuge							Under Refuge					1	1		Under Refuge		Under Refuge
71			Under Refuge							Under Refuge		1						Under Refuge		Under Refuge
71.2			Under Refuge		1					Under Refuge					1			Under Refuge	1	Under Refuge
71.4			Under Refuge							Under Refuge								Under Refuge		Under Refuge
71.6	1		Under Refuge							Under Refuge								Under Refuge		Under Refuge
71.8		1	Under Refuge							Under Refuge								Under Refuge		Under Refuge
72			Under Refuge			1				Under Refuge								Under Refuge		Under Refuge
72.2	1		Under Refuge							Under Refuge							1	Under Refuge		Under Refuge
72.4			Under Refuge							Under Refuge					1			Under Refuge		Under Refuge
72.6			Under Refuge							Under Refuge								Under Refuge		Under Refuge
72.8			Under Refuge							Under Refuge								Under Refuge	1	Under Refuge
73		1	Under Refuge							Under Refuge								Under Refuge		Under Refuge
73.2			Under Refuge		1	1	1			Under Refuge								Under Refuge		Under Refuge
73.4	1		1							Under Refuge								Under Refuge		Under Refuge
73.6										Under Refuge								Under Refuge		Under Refuge
73.8										Under Refuge		1						Under Refuge		Under Refuge
74										Under Refuge								Under Refuge		Under Refuge
74.2			1		1					Under Refuge					1			Under Refuge		Under Refuge
74.4										Under Refuge								Under Refuge		Under Refuge
74.6								1		Under Refuge					1			Under Refuge		Under Refuge
74.8					1					Under Refuge								Under Refuge		Under Refuge
75						1				Under Refuge		1						Under Refuge		Under Refuge
75.2										Under Refuge					1			Under Refuge		Under Refuge
75.4										Under Refuge								Under Refuge		Under Refuge
75.6										Under Refuge								Under Refuge		Under Refuge
75.8										Under Refuge			1					Under Refuge		Under Refuge
76		1								Under Refuge								Under Refuge		Under Refuge
76.2							1			Under Refuge								Under Refuge		Under Refuge
76.4										Under Refuge					1			Under Refuge		Under Refuge
76.6					Under Refuge					Under Refuge								Under Refuge		Under Refuge
76.8				1	Under Refuge					Under Refuge								Under Refuge		Under Refuge
77					1					Under Refuge				1				Under Refuge		Under Refuge
77.2	1									Under Refuge					1			Under Refuge		Under Refuge
77.4										Under Refuge								Under Refuge		Under Refuge
77.6					1					Under Refuge								Under Refuge		Under Refuge
77.8										Under Refuge								Under Refuge		Under Refuge
78										Under Refuge	1				1			Under Refuge		Under Refuge
78.2										Under Refuge								Under Refuge		Under Refuge
78.4							1			Under Refuge						1		Under Refuge		Under Refuge
78.6										Under Refuge					1	1		Under Refuge		Under Refuge
78.8		1			1					Under Refuge			1					Under Refuge		Under Refuge
79										Under Refuge				1				Under Refuge		Under Refuge
79.2										Under Refuge								Under Refuge		Under Refuge
79.4									1	Under Refuge		1						Under Refuge	1	Under Refuge
79.6			1							Under Refuge								Under Refuge		Under Refuge
79.8						1				Under Refuge						1		Under Refuge		Under Refuge
80	1									Under Refuge								Under Refuge		Under Refuge
80.2										Under Refuge			1		1	1		Under Refuge		Under Refuge
80.4					1					Under Refuge					1			Under Refuge		Under Refuge
80.6										Under Refuge								1		Under Refuge
80.8		1								Under Refuge	1									Under Refuge
81			1							Under Refuge										Under Refuge
81.2						1	1			Under Refuge					1					Under Refuge
81.4					1					Under Refuge										Under Refuge
81.6			1							Under Refuge		1	1							Under Refuge
81.8	1								1	Under Refuge										Under Refuge
82			1							Under Refuge				1				1		Under Refuge
82.2										Under Refuge						1				Under Refuge
82.4		1						1		Under Refuge										Under Refuge
82.6										Under Refuge					1					Under Refuge
82.8			1							Under Refuge										Under Refuge
83	1									Under Refuge										Under Refuge
83.2		1								Under Refuge								1		Under Refuge
83.4									1	Under Refuge										Under Refuge
83.6										Under Refuge										Under Refuge
83.8										Under Refuge	1				1					Under Refuge
84			1		1					Under Refuge										Under Refuge
84.2										Under Refuge					1					Under Refuge
84.4	1									Under Refuge				1						Under Refuge
84.6										Under Refuge						1				Under Refuge
84.8									1	Under Refuge										Under Refuge
85			1		1					Under Refuge										Under Refuge
85.2										Under Refuge										Under Refuge
85.4			1							Under Refuge	1	1								Under Refuge
85.6									1	Under Refuge						1		1		Under Refuge
85.8										Under Refuge					1					Under Refuge
86										Under Refuge										Under Refuge
86.2		1								Under Refuge			1							Under Refuge
86.4										Under Refuge								1		Under Refuge
86.6	1		1							Under Refuge		1								Under Refuge
86.8					1					Under Refuge					1					Under Refuge
87			1	1						Under Refuge										Under Refuge
87.2										Under Refuge				1				1		Under Refuge
87.4			1					1		Under Refuge										Under Refuge
87.6							1			Under Refuge										Under Refuge
87.8			1							Under Refuge								1		Under Refuge
88	1									Under Refuge										Under Refuge
88.2			1				1			Under Refuge				1						Under Refuge
88.4					1	1			1	Under Refuge		1				1				Under Refuge
88.6				1						Under Refuge										Under Refuge
88.8	1	1								Under Refuge	1									Under Refuge
89										Under Refuge				1						Under Refuge
89.2										Under Refuge								1		Under Refuge
89.4			1				1		1	Under Refuge										Under Refuge
89.6					1	1		1		Under Refuge					1					Under Refuge
89.8										Under Refuge										Under Refuge
90			1						1	Under Refuge	Under Refuge									Under Refuge
90.2										Under Refuge	Under Refuge									Under Refuge
90.4			1							Under Refuge	Under Refuge					1		1		Under Refuge
90.6						1				Under Refuge	Under Refuge									Under Refuge
90.8					1					Under Refuge	Under Refuge	1			1					Under Refuge
91			1							Under Refuge	Under Refuge									Under Refuge
91.2										Under Refuge	Under Refuge	On Refuge				1			1	Under Refuge
91.4	1		1							Under Refuge	Under Refuge	On Refuge						1		Under Refuge
91.6								1		Under Refuge	Under Refuge	On Refuge								Under Refuge
91.8										Under Refuge	Under Refuge	On Refuge			1					Under Refuge
92										Under Refuge	Under Refuge	On Refuge								Under Refuge
92.2			1							Under Refuge	Under Refuge	On Refuge								Under Refuge
92.4										Under Refuge	Under Refuge	On Refuge	1	1		1				Under Refuge
92.6	1								1	Under Refuge	Under Refuge	On Refuge						1		Under Refuge
92.8										Under Refuge		On Refuge								Under Refuge
93		1								Under Refuge		On Refuge			Under Refuge					Under Refuge
93.2										Under Refuge		On Refuge			Under Refuge					Under Refuge
93.4								1		Under Refuge	1	On Refuge		1	Under Refuge					Under Refuge
93.6										Under Refuge		On Refuge			Under Refuge	1				Under Refuge
93.8	1		1							Under Refuge		On Refuge			Under Refuge				1	Under Refuge
94										Under Refuge		On Refuge	1		Under Refuge					Under Refuge
94.2		1	1							Under Refuge		On Refuge			Under Refuge					Under Refuge
94.4									1	Under Refuge		On Refuge			Under Refuge	1				Under Refuge
94.6										Under Refuge		On Refuge			Under Refuge					Under Refuge
94.8										Under Refuge		On Refuge			Under Refuge					Under Refuge
95			1							Under Refuge		On Refuge	1		Under Refuge		1			Under Refuge
95.2										Under Refuge		On Refuge			Under Refuge					Under Refuge
95.4					1				1	Under Refuge		On Refuge			Under Refuge			1		Under Refuge
95.6									1	Under Refuge		On Refuge			Under Refuge					Under Refuge
95.8		1								Under Refuge		On Refuge			Under Refuge					Under Refuge
96			1			1	1			Under Refuge		On Refuge		1	Under Refuge	1				Under Refuge
96.2			1							Under Refuge		On Refuge	1		Under Refuge				1	Under Refuge
96.4	1				1			1		Under Refuge	1	On Refuge			Under Refuge			1		Under Refuge
96.6										Under Refuge		On Refuge		1	Under Refuge					Under Refuge
96.8				1						Under Refuge		On Refuge			Under Refuge					Under Refuge
97										Under Refuge		On Refuge		1	Under Refuge	1	1			Under Refuge
97.2			1				1			Under Refuge		On Refuge			Under Refuge					Under Refuge
97.4										Under Refuge		On Refuge	1	1	Under Refuge					Under Refuge
97.6										Under Refuge		On Refuge			Under Refuge				1	Under Refuge
97.8				1						Under Refuge		On Refuge			Under Refuge					Under Refuge
98			1							Under Refuge		On Refuge			Under Refuge					Under Refuge
98.2										Under Refuge	1	On Refuge		1	Under Refuge					Under Refuge
98.4							1			Under Refuge		On Refuge			Under Refuge					Under Refuge
98.6										Under Refuge		On Refuge			1	1				Under Refuge
98.8		1	1				1			Under Refuge		1					1			Under Refuge
99										Under Refuge					1					Under Refuge
99.2						1				Under Refuge										Under Refuge
99.4				1						Under Refuge										Under Refuge
99.6	1						1			Under Refuge					1					Under Refuge
99.8			1		1					Under Refuge			1							Under Refuge
100		1				1				Under Refuge										Under Refuge
100.2			1							Under Refuge		On Refuge								1
100.4							1			Under Refuge		On Refuge
100.6										Under Refuge		On Refuge					1
100.8										Under Refuge		On Refuge
101		1								Under Refuge		On Refuge	1					1	1
101.2										Under Refuge		On Refuge				1
101.4							1		1	Under Refuge		On Refuge			1
101.6										Under Refuge		On Refuge
101.8										Under Refuge	1	On Refuge
102				1	1	1			1	Under Refuge		On Refuge	1	1
102.2	1		1				1			Under Refuge		On Refuge							1
102.4										Under Refuge		On Refuge						1
102.6		1								Under Refuge		On Refuge		1
102.8										Under Refuge		On Refuge
103			1	1						Under Refuge	1	On Refuge
103.2									1	Under Refuge		On Refuge
103.4				1			1	1		Under Refuge		On Refuge	1							1
103.6					1					Under Refuge		On Refuge						1	Under Refuge
103.8										Under Refuge		On Refuge							Under Refuge
104				1						Under Refuge		On Refuge							Under Refuge
104.2										Under Refuge		On Refuge							Under Refuge
104.4										Under Refuge		On Refuge		1				1	Under Refuge
104.6			1		Under Refuge		1			Under Refuge		On Refuge							Under Refuge
104.8					Under Refuge					Under Refuge		On Refuge							Under Refuge
105					Under Refuge					Under Refuge		On Refuge							Under Refuge
105.2					Under Refuge					Under Refuge		On Refuge				1			Under Refuge
105.4			1		Under Refuge					Under Refuge	1	On Refuge		1					Under Refuge
105.6					Under Refuge					Under Refuge		On Refuge							Under Refuge
105.8					Under Refuge					Under Refuge		On Refuge							Under Refuge
106					Under Refuge	1		1		Under Refuge		On Refuge						1	Under Refuge
106.2					Under Refuge					Under Refuge		On Refuge	1						Under Refuge
106.4					Under Refuge				1	Under Refuge		On Refuge			1				Under Refuge
106.6					Under Refuge					Under Refuge		On Refuge						1	Under Refuge
106.8			1		Under Refuge	1				Under Refuge		On Refuge							Under Refuge
107					Under Refuge					Under Refuge		On Refuge	1						Under Refuge
107.2				1	Under Refuge					Under Refuge		On Refuge							Under Refuge
107.4					Under Refuge					Under Refuge		On Refuge			1				Under Refuge
107.6			1		Under Refuge				1	Under Refuge		On Refuge						1	Under Refuge
107.8					Under Refuge					Under Refuge		On Refuge							Under Refuge
108			1		Under Refuge	1				Under Refuge		On Refuge							Under Refuge
108.2					Under Refuge					Under Refuge	1	On Refuge							Under Refuge
108.4			1		Under Refuge				1	Under Refuge		On Refuge							1	Under Refuge
108.6					Under Refuge	1				Under Refuge		On Refuge								Under Refuge
108.8				1	1				1	Under Refuge		On Refuge			1					Under Refuge
109										Under Refuge		On Refuge								Under Refuge
109.2										Under Refuge		On Refuge								Under Refuge
109.4										Under Refuge		On Refuge	1							Under Refuge
109.6					1					Under Refuge		On Refuge								Under Refuge
109.8			1							Under Refuge		On Refuge			1			1		Under Refuge
110			Under Refuge							Under Refuge	1	On Refuge								Under Refuge
110.2			Under Refuge		1					Under Refuge		On Refuge								Under Refuge
110.4			Under Refuge							Under Refuge		On Refuge								Under Refuge
110.6			Under Refuge							Under Refuge		On Refuge								Under Refuge
110.8			Under Refuge							Under Refuge		1	1							Under Refuge
111			Under Refuge							Under Refuge	1			1						Under Refuge
111.2			Under Refuge							Under Refuge								1		Under Refuge
111.4			Under Refuge		1					Under Refuge				1						Under Refuge
111.6			Under Refuge							Under Refuge										Under Refuge
111.8			Under Refuge							Under Refuge										Under Refuge
112			Under Refuge						1	Under Refuge	1			1	1			1		Under Refuge
112.2			1							Under Refuge										Under Refuge
112.4										Under Refuge		1								Under Refuge
112.6			1		1					Under Refuge				1						Under Refuge
112.8		1				1				Under Refuge			1							Under Refuge
113										Under Refuge									1	Under Refuge
113.2			1							Under Refuge	1					1				Under Refuge
113.4					1			1	1	Under Refuge								1		Under Refuge
113.6										Under Refuge		1								Under Refuge
113.8										Under Refuge										Under Refuge
114										Under Refuge	1			1						Under Refuge
114.2										Under Refuge									1	Under Refuge
114.4						1				Under Refuge						1				Under Refuge
114.6										Under Refuge								1		Under Refuge
114.8		1								Under Refuge				1						Under Refuge
115	1									Under Refuge						1				Under Refuge
115.2										Under Refuge									1	Under Refuge
115.4			1				1	1		Under Refuge										Under Refuge
115.6						1				Under Refuge										Under Refuge
115.8							1			Under Refuge										Under Refuge
116										Under Refuge								1		Under Refuge
116.2		1								Under Refuge				1		1				Under Refuge
116.4							1			Under Refuge	1									Under Refuge
116.6										Under Refuge										Under Refuge
116.8	1					1				Under Refuge			1			1				Under Refuge
117			1		1		1			Under Refuge										Under Refuge
117.2										Under Refuge										Under Refuge
117.4										Under Refuge			1	1					1	Under Refuge
117.6										Under Refuge				1						Under Refuge
117.8				1						Under Refuge										Under Refuge
118	1					1				Under Refuge						1	1	1		Under Refuge
118.2								1		Under Refuge	1									Under Refuge
118.4					1					Under Refuge			1			1				Under Refuge
118.6							1			Under Refuge								Under Refuge		Under Refuge
118.8										Under Refuge						1		Under Refuge		Under Refuge
119										Under Refuge		1						Under Refuge	1	Under Refuge
119.2										Under Refuge	1							Under Refuge		Under Refuge
119.4	1		1			1				Under Refuge								Under Refuge		Under Refuge
119.6										Under Refuge			1					Under Refuge		Under Refuge
119.8		1	1				1			Under Refuge						1		Under Refuge	1	Under Refuge
120					1					Under Refuge								Under Refuge		Under Refuge
120.2										Under Refuge				1				Under Refuge		Under Refuge
120.4										Under Refuge			1					Under Refuge	1	Under Refuge
120.6							1		1	Under Refuge		1						Under Refuge		Under Refuge
120.8			1	1						Under Refuge	1							Under Refuge		Under Refuge
121	1									Under Refuge								Under Refuge		Under Refuge
121.2										Under Refuge				1				Under Refuge		Under Refuge
121.4										Under Refuge								Under Refuge		Under Refuge
121.6			1				1		1	Under Refuge								Under Refuge	1	Under Refuge
121.8										Under Refuge				1				Under Refuge		Under Refuge
122										Under Refuge								Under Refuge		Under Refuge
122.2								1		Under Refuge						1		Under Refuge		Under Refuge
122.4					1					Under Refuge								Under Refuge		Under Refuge
122.6	1									Under Refuge		1						Under Refuge		Under Refuge
122.8							1			Under Refuge			1					Under Refuge		Under Refuge
123									1	Under Refuge								Under Refuge		Under Refuge
123.2										Under Refuge								Under Refuge		Under Refuge
123.4	1									Under Refuge								1		Under Refuge
123.6		1	1							Under Refuge	1									Under Refuge
123.8			On Refuge							Under Refuge				1		1	1			Under Refuge
124	1	1	On Refuge	1						1										Under Refuge
124.2			On Refuge		1													1		Under Refuge
124.4			On Refuge																	Under Refuge
124.6			On Refuge		1		1							1						Under Refuge
124.8	1		On Refuge														1			Under Refuge
125			On Refuge																	Under Refuge
125.2			On Refuge		1															Under Refuge
125.4			On Refuge			1					1					1				Under Refuge
125.6		1	On Refuge	1			1			1							1			Under Refuge
125.8	1		On Refuge													1				Under Refuge
126			On Refuge									1	1					1	1	Under Refuge
126.2			On Refuge						1					1						Under Refuge
126.4			On Refuge																	Under Refuge
126.6			On Refuge			1														Under Refuge
126.8			On Refuge																	Under Refuge
127		1	On Refuge		1									1	1					Under Refuge
127.2	1		On Refuge	1							1					1				Under Refuge
127.4			On Refuge									1					1	1		Under Refuge
127.6			On Refuge				1	1												Under Refuge
127.8			On Refuge		1					Under Refuge										Under Refuge
128			On Refuge			1				Under Refuge	1									Under Refuge
128.2	1		On Refuge							Under Refuge										Under Refuge
128.4			On Refuge							Under Refuge										Under Refuge
128.6			On Refuge				1			Under Refuge			1	1				1		Under Refuge
128.8			On Refuge							Under Refuge						1				Under Refuge
129			On Refuge							Under Refuge		1								Under Refuge
129.2		1	On Refuge							Under Refuge										Under Refuge
129.4			1			1		1		Under Refuge										Under Refuge
129.6			1							Under Refuge	1							1	1	Under Refuge
129.8										Under Refuge										Under Refuge
130							1			Under Refuge					1	1				Under Refuge
130.2			1							Under Refuge				1					1	Under Refuge
130.4	1									Under Refuge							1			Under Refuge
130.6			1			1				Under Refuge										Under Refuge
130.8										Under Refuge										Under Refuge
131			1				1			Under Refuge						1				Under Refuge
131.2	1									Under Refuge									1	Under Refuge
131.4		1							1	Under Refuge	1		1							Under Refuge
131.6			1							Under Refuge						1				Under Refuge
131.8										Under Refuge								1		Under Refuge
132		1								Under Refuge	1			1						Under Refuge
132.2										Under Refuge										Under Refuge
132.4			1							Under Refuge		1				1				Under Refuge
132.6										Under Refuge									1	Under Refuge
132.8			1							Under Refuge						1				Under Refuge
133										Under Refuge										Under Refuge
133.2		1			1					Under Refuge			1	1						Under Refuge
133.4	1		1							Under Refuge		1			1	1			1	Under Refuge
133.6						1				Under Refuge							1			Under Refuge
133.8										Under Refuge	1									Under Refuge
134			1							Under Refuge			1			1				Under Refuge
134.2		1					1			Under Refuge								1		Under Refuge
134.4										Under Refuge				1						Under Refuge
134.6			1							Under Refuge					1					Under Refuge
134.8	1			1						Under Refuge										Under Refuge
135										Under Refuge			1					1		Under Refuge
135.2									Under Refuge	Under Refuge		1					1			Under Refuge
135.4						1			Under Refuge	Under Refuge					1					Under Refuge
135.6		1							Under Refuge	Under Refuge										Under Refuge
135.8									Under Refuge	Under Refuge										Under Refuge
136									Under Refuge	Under Refuge			1							Under Refuge
136.2		1		1					Under Refuge	Under Refuge										Under Refuge
136.4					1				Under Refuge	Under Refuge						1				Under Refuge
136.6									Under Refuge	Under Refuge					1					Under Refuge
136.8									Under Refuge	Under Refuge			1				1			Under Refuge
137	1								Under Refuge	Under Refuge				1	1			1		Under Refuge
137.2							1		Under Refuge	1						1				Under Refuge
137.4			1	1					Under Refuge							1				Under Refuge
137.6									Under Refuge											Under Refuge
137.8					1			1	Under Refuge			1	1			1				Under Refuge
138									Under Refuge						1					Under Refuge
138.2		1							Under Refuge									Under Refuge		Under Refuge
138.4			1				1		Under Refuge									Under Refuge		Under Refuge
138.6									Under Refuge				1		1			Under Refuge		Under Refuge
138.8									Under Refuge									Under Refuge	1	Under Refuge
139				1	1				Under Refuge	Under Refuge		1						Under Refuge		Under Refuge
139.2	1		1				1		Under Refuge	Under Refuge	1							Under Refuge		Under Refuge
139.4									Under Refuge	Under Refuge			1					Under Refuge		Under Refuge
139.6		1				1			1	Under Refuge					1			Under Refuge		Under Refuge
139.8			1	1						Under Refuge					Under Refuge			Under Refuge		Under Refuge
140					1					Under Refuge					Under Refuge			Under Refuge		Under Refuge
140.2										Under Refuge				1	Under Refuge	1	1	Under Refuge		Under Refuge
140.4							1			Under Refuge					1			Under Refuge		Under Refuge
140.6			1	1			1	1		Under Refuge				1				Under Refuge		Under Refuge
140.8	1									Under Refuge								Under Refuge		1
141										Under Refuge					1			Under Refuge
141.2										Under Refuge								Under Refuge
141.4			1							Under Refuge	1					1		Under Refuge
141.6		1					1			Under Refuge							1	1
141.8										Under Refuge			1
142										Under Refuge				1
142.2			1							Under Refuge						1
142.4								1		Under Refuge
142.6			1							Under Refuge					1	1
142.8									1	Under Refuge	1						1
143	1									Under Refuge
143.2			1				1			Under Refuge										1
143.4										Under Refuge
143.6										Under Refuge
143.8										Under Refuge								Under Refuge
144			1							Under Refuge		1						Under Refuge
144.2				1					1	Under Refuge			1		1			Under Refuge
144.4							1			Under Refuge								Under Refuge
144.6										Under Refuge							1	Under Refuge
144.8			1							Under Refuge								Under Refuge
145								1		Under Refuge					1			Under Refuge
145.2							1			Under Refuge			1					Under Refuge	1
145.4						1				Under Refuge								Under Refuge
145.6			1							Under Refuge						1		Under Refuge
145.8	1									Under Refuge				1				Under Refuge
146					1					Under Refuge								Under Refuge
146.2										Under Refuge								Under Refuge
146.4			1	1						Under Refuge							1	Under Refuge
146.6							1			Under Refuge					1			Under Refuge
146.8		1								Under Refuge		1						Under Refuge
147	1						1			Under Refuge	1							Under Refuge
147.2									1	Under Refuge					1	1		Under Refuge	1	1
147.4			1				1			Under Refuge								Under Refuge
147.6				1	1					Under Refuge					1			Under Refuge
147.8								1		Under Refuge								Under Refuge
148										Under Refuge			1			1		Under Refuge
148.2										Under Refuge							1	Under Refuge
148.4		1			1					Under Refuge						1		Under Refuge	1
148.6								1	1	Under Refuge					1			Under Refuge
148.8				1						Under Refuge								Under Refuge
149		1								Under Refuge					1			1
149.2	1				1					Under Refuge		1								1
149.4										Under Refuge
149.6		1								Under Refuge					1
149.8			1							Under Refuge			1					Under Refuge
150							1			Under Refuge								Under Refuge	1
150.2					1					Under Refuge								Under Refuge	1
150.4								1		Under Refuge				1		1		Under Refuge
150.6										Under Refuge								Under Refuge
150.8										Under Refuge					1			Under Refuge	1
151	1									Under Refuge			1					Under Refuge
151.2			1				1			Under Refuge							1	1
151.4										Under Refuge		1			1
151.6										Under Refuge
151.8					1			1		Under Refuge
152			1							Under Refuge	1				1	1
152.2										Under Refuge			1
152.4	1									1
152.6																			1
152.8															1
153			1
153.2
153.4									1							1		Under Refuge
153.6			1				1											Under Refuge
153.8					1						1							Under Refuge
154			1															Under Refuge
154.2				1		1												Under Refuge
154.4							1		1									Under Refuge
154.6					1											1		Under Refuge
154.8															1		1	Under Refuge
155																		Under Refuge
155.2							1	1				1				1		Under Refuge
155.4			Under Refuge												1			Under Refuge
155.6			Under Refuge		1													Under Refuge
155.8			Under Refuge						1									Under Refuge
156			Under Refuge													1		Under Refuge
156.2			Under Refuge		1		1				1		1					Under Refuge
156.4			Under Refuge													1		Under Refuge
156.6			Under Refuge									1						Under Refuge
156.8			Under Refuge		1												1	1	1
157			Under Refuge
157.2	1		Under Refuge				1	1		1						1				1
157.4			1		1				1			1						1
157.6
157.8			1
158								1
158.2		1			1						1						1		1
158.4			1
158.6												1
158.8	1									1						1
159																1	1	1
159.2							1		1
159.4			1		1										1
159.6	1															1
159.8					1								1
160																			1
160.2		1	1				1								1	1		1
160.4									1
160.6		1									1								1
160.8
161	1								1	1						1
161.2
161.4			1					1											1
161.6												1
161.8					1	1	1								1
162	1	1	1
162.2									1	1	1							1
162.4																1
162.6																			1
162.8					1
163			1					1	1							1
163.2				1								1			1
163.4	1						1												1
163.6		1				1
163.8			1															1
164													1							1
164.2																1
164.4			1				1			1
164.6					1	1													1
164.8																1	1
165																		1
165.2			1													1
165.4	1	1							1
165.6							1		1		1									1
165.8											1					1			1
166			1
166.2
166.4							1
166.6		1	1		1													1		1
166.8	1						1	1					1
167																	1
167.2												1
167.4			1	1										1
167.6		1														1
167.8					1	1												1
168							1
168.2			1											1						1
168.4	1				1					1		1			1
168.6			1													1				1
168.8																			1
169		1	1															1
169.2	1
169.4							1								1		1
169.6					1
169.8
170
170.2				1											1
170.4		1				1													1
170.6					1			1							1		1
170.8										1						1
171		1	Under Refuge																	1
171.2	1		Under Refuge															1
171.4			Under Refuge											1
171.6			Under Refuge		1											1
171.8			Under Refuge			1
172			Under Refuge						1
172.2			Under Refuge													1	1
172.4			Under Refuge
172.6	1		Under Refuge		1											1				1
172.8			Under Refuge
173			Under Refuge		1
173.2			Under Refuge
173.4			Under Refuge															1
173.6			Under Refuge							1						1
173.8			Under Refuge															1	1
174			Under Refuge				1	1
174.2		1	Under Refuge	1								1
174.4			1													1			1
174.6																1				1
174.8								1		1	1
175			1		1		1										1
175.2	1			1												1
175.4		1	1												1				1
175.6													1
175.8												1
176					1											1
176.2			1	1							1
176.4	1						1							1
176.6																			1
176.8			1
177										Under Refuge
177.2				1				1		Under Refuge						1
177.4					1		1			Under Refuge							1			1
177.6			1							Under Refuge		1							1
177.8	1					1				Under Refuge						1		1
178										Under Refuge		1
178.2								1		Under Refuge						1				1
178.4			1	1						Under Refuge
178.6					1				1	Under Refuge									1
178.8			1							Under Refuge							1
179										Under Refuge						1
179.2	1									Under Refuge		1
179.4										Under Refuge						1				1
179.6			1					1		Under Refuge
179.8										Under Refuge
180										Under Refuge										1
180.2	1						1			Under Refuge							1	1
180.4				1					1	Under Refuge
180.6										Under Refuge
180.8										1	1
181			1										1
181.2	1	1						1
181.4			1													1
181.6								1	1						1					1
181.8	1		1									1
182					1														1
182.2
182.4		1	1
182.6					1														1
182.8							1				1
183	1					1				1								1
183.2								1											1
183.4			1
183.6														1
183.8
184		1			1					Under Refuge
184.2									1	Under Refuge					1					1
184.4			1							Under Refuge									1
184.6	1					1				Under Refuge
184.8								1		Under Refuge
185		1			1	1	1			Under Refuge	1
185.2			1							Under Refuge		1	1
185.4									1	Under Refuge
185.6			1							Under Refuge
185.8	1									Under Refuge								1
186				1	1					1
186.2		1	1
186.4							1							1
186.6
186.8	1				1				1
187		1	1													1
187.2			Under Refuge
187.4			Under Refuge													1		1
187.6	1		Under Refuge					1
187.8			Under Refuge
188			Under Refuge							1
188.2			Under Refuge				1
188.4			Under Refuge				1		1
188.6			Under Refuge	1				1
188.8		1	Under Refuge													1
189			Under Refuge			1											1
189.2			Under Refuge						1
189.4			Under Refuge									1
189.6			Under Refuge						1
189.8			Under Refuge		1
190			Under Refuge			1										1			1
190.2			Under Refuge																	1
190.4			Under Refuge
190.6			Under Refuge				1		1	1		1				1
190.8			1
191					1													1
191.2
191.4												1				1				1
191.6	1					1
191.8			1													1
192									1
192.2
192.4								1								1
192.6						1						1								1
192.8			1		1
193	1															1
193.2																		1
193.4								1		1		1
193.6						1
193.8			1						1							1	1
194
194.2																				1
194.4							1							1	1	1			1
194.6									1
194.8																			1
195	1											1			1
195.2					1		1		1				1			1			1
195.4																				1
195.6			1
195.8																1	1	1
196							1
196.2					1			1							1	1
196.4
196.6											1								1
196.8							1					1								1
197			1
197.2						1		1		1
197.4	1			1													1
197.6															1	1
197.8																			1
198		1											1
198.2						1	1	1			1									1
198.4	1											1		1
198.6						1				1
198.8															1					1
199																			1
199.2				1
199.4		1					1				1				1
199.6																1
199.8	1					1														1
200
200.2			1					1
200.4		1					1	1						1		1			1
200.6												1					1	1
200.8	1	1		1		1				1						1				1
201											1				1				1
201.2					1												1
201.4									1
201.6	1					1	1								1
201.8										1
202		1										1		1			1
202.2															1	1
202.4																			1
202.6			1
202.8	1			1		1	1				1									1
203												1			1			1
203.2								1						1			1		1
203.4							1									1
203.6																				1
203.8
204				1								1				1	1
204.2		1				1
204.4							1							1
204.6					1		1
204.8										1					1	1			1
205	1
205.2		1										1								1
205.4						1
205.6								1			1
205.8												1		1
206		1								1
206.2															1	1	1
206.4																		1
206.6						1
206.8	1
207							1					1		1
207.2
207.4		1			1
207.6								1											1
207.8
208	1	1																		1
208.2							1
208.4														1
208.6											1				1	1
208.8						1						1						1
209											1								1
209.2	1													1
209.4		1													1
209.6																1	1
209.8
210	1			1		1													1
210.2						1		1					1							1
210.4																1
210.6		1																1
210.8
211															1
211.2											1
211.4				1		1								1	1
211.6					1														1
211.8	1					1										1
212								1											1
212.2										1										1
212.4															1
212.6	1					1						1					1
212.8											1
213			1	1															1
213.2									1					1	1			1
213.4																				1
213.6				1				1
213.8
214															1				1
214.2					1													1
214.4
214.6						1		1					1			1
214.8				1			1			1					1
215			1																1
215.2														1	1	1		1
215.4							1						1
215.6					1							1							1
215.8															1
216											1
216.2			1				1	1						1
216.4									1
216.6					1
216.8				1									1		1	1	1	1
217						1
217.2													1
217.4							1				1				1
217.6									1
217.8			1
218				1
218.2							1			1							1		1
218.4														1						1
218.6									1		1		1			1
218.8															1
219											1
219.2	1		1			1												1	1
219.4									1	1
219.6														1	1	1
219.8													1
220
220.2				1	1	1			1							1	1
220.4							1	1
220.6		1	1								1				1
220.8	1															1		1
221							1						1
221.2				1		1		1							1
221.4					1				1
221.6							1			1
221.8														1	1	1
222						1											1
222.2											1		1
222.4		1						1
222.6				1		1						1
222.8	1									1	1				1	1
223
223.2							1				1			1
223.4		1													1
223.6			1		1
223.8									1							1				1
224								1							1			1
224.2										1
224.4		1														1			1
224.6	1										1
224.8																		1
225																1
225.2									1					1
225.4													1			1		1
225.6											1	1			1
225.8							1			1
226			1
226.2																		1
226.4
226.6	1	1			1								1		1
226.8																			1
227						1			1	1
227.2													1
227.4																				1
227.6																		1	1
227.8												1					1
228		1									1					1	1			1
228.2																			1
228.4						1
228.6													1	1				1
228.8			1					1									1
229										1						1				1
229.2							1												1
229.4		1															1
229.6						1						1			1			1
229.8	1										1					1
230								1
230.2																				1
230.4									1				1
230.6																1		1
230.8	1						1
231					1												1
231.2															1	1				1
231.4			1
231.6						1				1
231.8							1											1
232													1
232.2	1										1				1	1	1
232.4
232.6												1
232.8				1					1						1	1
233						1
233.2			1															1		1
233.4															1
233.6	1																	1
233.8													1			1
234		1		1								1		1
234.2																		1	1
234.4								1	1								Under Refuge
234.6																	Under Refuge
234.8															1		Under Refuge
235			1				1					1					Under Refuge			1
235.2															1	1	Under Refuge
235.4																	Under Refuge		1
235.6								1	1						1		Under Refuge	1
235.8				1													Under Refuge
236						1									1		Under Refuge
236.2													1			1	Under Refuge
236.4							1										Under Refuge		1
236.6																	Under Refuge	1		1
236.8	1				1				1		1					1	Under Refuge
237															1		Under Refuge
237.2						1											Under Refuge
237.4			1												1	1	Under Refuge		1
237.6																	Under Refuge		1
237.8									1								Under Refuge	1
238																1	Under Refuge			1
238.2						1											Under Refuge
238.4																	Under Refuge
238.6		1														1	Under Refuge		1
238.8											1						Under Refuge			1
239												1					Under Refuge
239.2	1																Under Refuge
239.4			1				1										Under Refuge
239.6																1	Under Refuge	1	1
239.8										1							Under Refuge			1
240					1		1										Under Refuge
240.2						1									1		Under Refuge
240.4								1				1					Under Refuge
240.6																	Under Refuge
240.8			1														Under Refuge		1
241		1							1								Under Refuge	1		1
241.2							1										Under Refuge
241.4			1						Under Refuge						1		Under Refuge
241.6	1								Under Refuge				1				Under Refuge
241.8									Under Refuge	1		1					Under Refuge
242									Under Refuge								Under Refuge
242.2									Under Refuge						1		Under Refuge
242.4							1		Under Refuge								Under Refuge		1
242.6		1							1				1				Under Refuge
242.8			1														Under Refuge	1
243	1															1	Under Refuge
243.2																	Under Refuge	1
243.4				1								1					Under Refuge
243.6	1														1		Under Refuge
243.8																	Under Refuge
244								1									Under Refuge	1
244.2			1														Under Refuge
244.4							1					1					Under Refuge		1	1
244.6						1											Under Refuge
244.8	1										1						Under Refuge
245							1										Under Refuge
245.2																	Under Refuge	1
245.4									Under Refuge								Under Refuge
245.6				1					Under Refuge								Under Refuge
245.8					1			1	Under Refuge			1					Under Refuge
246	1		1				1		Under Refuge								Under Refuge		1
246.2									Under Refuge						1		Under Refuge
246.4	1								Under Refuge								Under Refuge
246.6									Under Refuge								Under Refuge		1
246.8									Under Refuge	1		1			1		Under Refuge
247									Under Refuge								Under Refuge		1
247.2									Under Refuge								Under Refuge
247.4									Under Refuge								Under Refuge
247.6			1						Under Refuge			1			1	1	Under Refuge
247.8									Under Refuge								Under Refuge
248									Under Refuge								Under Refuge
248.2									Under Refuge			1					Under Refuge
248.4									Under Refuge	1							Under Refuge		1
248.6									Under Refuge					1			Under Refuge
248.8					1				Under Refuge											1
249	1					1			1									1
249.2
249.4															1
249.6			1		1	1										1
249.8
250												1		1
250.2	1					1
250.4					1					1
250.6							1								1
250.8
251			1						1
251.2						1							1			1
251.4	1										1			1
251.6															1		Under Refuge
251.8	1					1											Under Refuge
252																	Under Refuge
252.2																	Under Refuge			1
252.4					1												Under Refuge
252.6											1	1			1		Under Refuge
252.8						1				Under Refuge				1			Under Refuge
253			1							Under Refuge							Under Refuge
253.2										Under Refuge							Under Refuge
253.4										Under Refuge						1	Under Refuge
253.6					1					Under Refuge							Under Refuge
253.8										Under Refuge	1				1		Under Refuge
254	1								1	Under Refuge							Under Refuge
254.2										Under Refuge							Under Refuge		1
254.4										Under Refuge							Under Refuge			1
254.6					1					Under Refuge							Under Refuge
254.8										Under Refuge	1				1		Under Refuge
255										Under Refuge							Under Refuge			1
255.2		1	1		1					Under Refuge							Under Refuge	1
255.4					Under Refuge	1	1			Under Refuge			1				Under Refuge
255.6	1				Under Refuge	Under Refuge				Under Refuge							Under Refuge
255.8					Under Refuge	Under Refuge				Under Refuge
256					Under Refuge	Under Refuge				Under Refuge					1		1		1
256.2					Under Refuge	Under Refuge				Under Refuge	1	1		1
256.4					Under Refuge	Under Refuge				Under Refuge								1
256.6					Under Refuge	Under Refuge				Under Refuge
256.8					Under Refuge	Under Refuge			1	Under Refuge		1								1
257					Under Refuge	Under Refuge				Under Refuge									1
257.2			1		Under Refuge	Under Refuge				Under Refuge
257.4					Under Refuge	Under Refuge				Under Refuge
257.6					Under Refuge	Under Refuge				Under Refuge				1
257.8					Under Refuge	Under Refuge				1								1
258					Under Refuge	Under Refuge
258.2					1	Under Refuge					1						1
258.4						Under Refuge
258.6						Under Refuge			1
258.8						Under Refuge				Under Refuge						1		1
259			1		1	Under Refuge				Under Refuge										1
259.2										Under Refuge
259.4			1							Under Refuge
259.6					1					Under Refuge	1				1
259.8									1	Under Refuge
260			1			1				Under Refuge
260.2										Under Refuge
260.4										Under Refuge								1
260.6										Under Refuge				1						1
260.8			1		1					Under Refuge		1
261								1		Under Refuge
261.2						Under Refuge	1			Under Refuge						1
261.4						Under Refuge				Under Refuge								1
261.6		1				Under Refuge				Under Refuge										1
261.8						Under Refuge				Under Refuge
262			1			Under Refuge				Under Refuge
262.2	1	1				Under Refuge				Under Refuge	1
262.4						Under Refuge				Under Refuge
262.6						Under Refuge				1								1		1
262.8					1	Under Refuge										1
263						Under Refuge						1					1
263.2		1				Under Refuge				1
263.4			1			Under Refuge									1				1
263.6						Under Refuge
263.8						Under Refuge
264						Under Refuge			1									1
264.2	1					Under Refuge													1	1
264.4			1			Under Refuge				1
264.6		1				Under Refuge
264.8						Under Refuge										1
265					1	Under Refuge
265.2						Under Refuge				Under Refuge								1
265.4		1				Under Refuge				Under Refuge				On Refuge
265.6	1					Under Refuge				Under Refuge				On Refuge
265.8						Under Refuge				Under Refuge				On Refuge
266			1			Under Refuge				Under Refuge				On Refuge						1
266.2					1	Under Refuge				Under Refuge				On Refuge					1
266.4		1				Under Refuge				Under Refuge				On Refuge
266.6						Under Refuge				Under Refuge		1		On Refuge
266.8						Under Refuge				Under Refuge				On Refuge
267					1	Under Refuge				Under Refuge				On Refuge
267.2			1			Under Refuge				Under Refuge				On Refuge	1	1
267.4						Under Refuge	1			Under Refuge	1			On Refuge					1
267.6						Under Refuge				Under Refuge				On Refuge						1
267.8					1	Under Refuge				Under Refuge				On Refuge
268		1				Under Refuge				Under Refuge				On Refuge
268.2						Under Refuge				Under Refuge		1		On Refuge
268.4						Under Refuge				Under Refuge	1			On Refuge
268.6						Under Refuge				Under Refuge				On Refuge			1
268.8						Under Refuge				Under Refuge			1	On Refuge	1
269	1				1	Under Refuge				Under Refuge				On Refuge
269.2						Under Refuge				1				On Refuge
269.4						Under Refuge	1							On Refuge						1
269.6			1			Under Refuge								On Refuge
269.8						Under Refuge						1		On Refuge
270						Under Refuge								On Refuge	1			1
270.2	1					Under Refuge								On Refuge
270.4			1			Under Refuge					1			On Refuge					1
270.6						Under Refuge						1		On Refuge
270.8		1				Under Refuge								On Refuge
271						Under Refuge								On Refuge
271.2	1					Under Refuge		1		1				On Refuge
271.4			1			Under Refuge					1			On Refuge				1	1
271.6		1				Under Refuge	1							On Refuge
271.8					1	Under Refuge						1		On Refuge
272						Under Refuge								On Refuge
272.2	1					Under Refuge								On Refuge
272.4						Under Refuge								On Refuge					1
272.6		1			1	Under Refuge				1				On Refuge
272.8						Under Refuge	1					1		On Refuge
273						Under Refuge								On Refuge					1
273.2			1			Under Refuge								On Refuge		1		1
273.4	1					Under Refuge								On Refuge			1		1	1
273.6					1	Under Refuge			1					On Refuge	1			1
273.8						Under Refuge								On Refuge			1
274						Under Refuge								On Refuge
274.2						Under Refuge						1		On Refuge					1	1
274.4						Under Refuge								On Refuge				1
274.6	1					Under Refuge	1							On Refuge
274.8						Under Refuge				1	1			On Refuge
275						Under Refuge								On Refuge					1	1
275.2						Under Refuge				1				On Refuge	1
275.4						Under Refuge								On Refuge				1
275.6			1			Under Refuge						1		On Refuge			1			1
275.8						Under Refuge				1				1					1
276					1	Under Refuge
276.2						Under Refuge
276.4					1	Under Refuge					1	1
276.6						Under Refuge
276.8						Under Refuge
277						Under Refuge					1				1
277.2		1				Under Refuge														1
277.4					1	Under Refuge
277.6						Under Refuge						1			1
277.8	1				1	Under Refuge	1		1											1
278			1			Under Refuge
278.2						Under Refuge							1
278.4						Under Refuge
278.6	1				1	Under Refuge	1				1				1				1
278.8		1				Under Refuge		1
279						Under Refuge
279.2						Under Refuge
279.4						Under Refuge				1	1	1								1
279.6					1	Under Refuge	1								1
279.8						Under Refuge				1
280	1	1				Under Refuge
280.2						Under Refuge										1
280.4						Under Refuge
280.6						Under Refuge
280.8						Under Refuge	1							1
281						Under Refuge		1							1
281.2						Under Refuge
281.4	1					Under Refuge						1
281.6						Under Refuge
281.8						Under Refuge			1
282						Under Refuge				1										1
282.2						Under Refuge									1		Under Refuge
282.4			1		1	Under Refuge											Under Refuge			1
282.6	1					Under Refuge	1										Under Refuge
282.8						Under Refuge					1						Under Refuge
283						Under Refuge							1				Under Refuge
283.2					1	Under Refuge						1		1			Under Refuge
283.4						Under Refuge			1	1					1		Under Refuge
283.6	1					Under Refuge		1									Under Refuge			1
283.8						Under Refuge					1						Under Refuge
284						Under Refuge											Under Refuge
284.2						Under Refuge										1	Under Refuge
284.4						Under Refuge	1								1		Under Refuge			1
284.6						Under Refuge											Under Refuge
284.8						Under Refuge				1							Under Refuge
285						Under Refuge									1		Under Refuge	1
285.2						Under Refuge						1					Under Refuge
285.4	1	1				Under Refuge								1			Under Refuge		1
285.6						Under Refuge											Under Refuge	1
285.8						Under Refuge			1								Under Refuge
286						Under Refuge	1										Under Refuge
286.2						Under Refuge					1				1		Under Refuge			1
286.4						Under Refuge											Under Refuge
286.6						Under Refuge				1							Under Refuge
286.8						Under Refuge											Under Refuge
287	1					Under Refuge											Under Refuge	1
287.2						Under Refuge											Under Refuge
287.4						Under Refuge				1							Under Refuge
287.6						Under Refuge		1			1				1		Under Refuge	1
287.8						Under Refuge										1	Under Refuge
288						Under Refuge											Under Refuge			1
288.2						Under Refuge	1			1				1			Under Refuge
288.4	1					Under Refuge											Under Refuge
288.6						Under Refuge											Under Refuge
288.8						Under Refuge											Under Refuge
289						Under Refuge											Under Refuge	1		1
289.2						Under Refuge											Under Refuge
289.4	1					Under Refuge			1								Under Refuge
289.6		1				Under Refuge	1										Under Refuge
289.8						Under Refuge				1							Under Refuge	1
290			1			Under Refuge		1									Under Refuge
290.2						Under Refuge			1								Under Refuge			1
290.4						1						1					Under Refuge
290.6																	Under Refuge
290.8	1																Under Refuge
291																	Under Refuge
291.2								1									Under Refuge
291.4			1							1							Under Refuge	1
291.6		1			1	1						1				1	Under Refuge
291.8									1					1			Under Refuge
292																	Under Refuge
292.2																	Under Refuge	1
292.4					1	1											Under Refuge
292.6	1																Under Refuge
292.8																	Under Refuge			1
293																	Under Refuge
293.2			1				1										Under Refuge
293.4		1															Under Refuge
293.6					1	1											Under Refuge	1	1
293.8																	Under Refuge
294										1		1					Under Refuge	1
294.2	1								1								Under Refuge
294.4			1				1										Under Refuge
294.6						1											Under Refuge
294.8											1			1			Under Refuge	1
295																	Under Refuge
295.2	1																Under Refuge		1
295.4																	Under Refuge
295.6																	Under Refuge
295.8																	Under Refuge
296		1			1									1			Under Refuge	1
296.2								1	1								Under Refuge
296.4	1		1														Under Refuge
296.6								1	1	1	1						Under Refuge	1	1
296.8						1	1							1		1	Under Refuge
297					1	1											Under Refuge
297.2													1				Under Refuge	1
297.4																	Under Refuge
297.6	1	1										1
297.8															1
298					1						1
298.2						1								1
298.4					1														1
298.6							1
298.8					1			1									1
299									1		1
299.2	1																			Under Refuge
299.4						1		1						1						Under Refuge
299.6		1			1											1				Under Refuge
299.8										1										Under Refuge
300																	1	1	1	Under Refuge
300.2					1				1
300.4	1														1

## Sheet: LB Raw Data
Time	CRC170513-04 Trial 1	CRC170513-04 Trial 2	CRC170513-04 Trial 3	CRC170513-04 Trial 4	CRC170513-04 Trial 5	CRC170513-10 Trial 1	CRC170513-10 Trial 2	CRC170513-10 Trial 3	CRC170513-10 Trial 4	CRC170513-10 Trial 5	CRC170515-05 Trial 1	CRC170515-05 Trial 2	CRC170515-05 Trial 3	CRC170515-05 Trial 4	CRC170515-05 Trial 5	CRC170515-06 Trial 1	CRC170515-06 Trial 2	CRC170515-06 Trial 3	CRC170515-06 Trial 4	CRC170515-06 Trial 5
0	Start Trial	Start Trial	Start Trial	Start Trial	Start Trial	Start Trial	Start Trial	Start Trial	Start Trial	Start Trial	Start Trial	Start Trial	Start Trial	Start Trial	Start Trial	Start Trial	Start Trial	Start Trial	Start Trial	Start Trial
0.2		Exit Refuge				Exit Refuge				Exit Refuge					Exit Refuge					Exit Refuge
0.4		1				1				1					1			Exit Refuge		1
0.6		1				1				1					1	Exit Refuge		1
0.8																1		1
1							Exit Refuge									1
1.2							1											1		1
1.4					Exit Refuge							Exit Refuge			1
1.6					1							1
1.8							1											1
2		1				1				1					1					1
2.2																1
2.4					1		1
2.6
2.8						1						1	Exit Refuge					1
3		1								1			1		1		Exit Refuge
3.2					1
3.4						1							1				1
3.6					1				Exit Refuge								1	1		1
3.8						1			1						1
4					1				1
4.2															1
4.4		1								1							1	1
4.6	Exit Refuge
4.8	1	1			1	1				1		1								1
5							1								1
5.2
5.4						1
5.6		1								1		1
5.8															1
6						1
6.2							1								1					1
6.4		1								1		1				1
6.6						1
6.8							1						1
7															1
7.2		1								1		1						1
7.4																				1
7.6		1				1				1
7.8															1
8							1					1
8.2	1	1				1				1								1		1
8.4
8.6		1		Exit Refuge						1							1
8.8						1									1
9				1								1
9.2																		1		1
9.4
9.6	1											1
9.8
10		1		1						1							1
10.2																				1
10.4
10.6		1		1		1				1
10.8
11								Exit Refuge											Exit Refuge
11.2	1					1		1				1				1				1
11.4				1
11.6																		1
11.8																	1		1
12															1
12.2		1	Exit Refuge					1		1
12.4
12.6							1								1
12.8				1														1		1
13		1	1							1					1
13.2																				1
13.4
13.6																			1
13.8		1						1		1
14	1						1											1
14.2
14.4																		1		1
14.6																	1
14.8	1	1	1							1										1
15				1			1
15.2															1
15.4								1					1				1	1
15.6		1								1										1
15.8																			1
16	1		1
16.2						1	1					1			Under Refuge		1	1
16.4				1											Under Refuge					1
16.6								1							Under Refuge
16.8	1											1			Under Refuge
17		1				1				1					Under Refuge
17.2													1		Under Refuge			1
17.4		1				1	1			1		1			Under Refuge
17.6															Under Refuge				1
17.8	1			1											Under Refuge
18		1					1			1					Under Refuge			1
18.2															Under Refuge
18.4	1														Under Refuge		1			1
18.6															Under Refuge
18.8						1	1					1			Under Refuge
19												1			Under Refuge					1
19.2															Under Refuge
19.4															Under Refuge
19.6						1									Under Refuge
19.8															Under Refuge			1
20	1							1							Under Refuge
20.2			1												Under Refuge
20.4													1		1
20.6						1												1		1
20.8								1							1		1
21							1													1
21.2	1																		1
21.4				1														1
21.6						1											1
21.8	1														1
22		1				1				1										1
22.2			1															1
22.4		1						1		1
22.6				1
22.8		1					1			1					1					1
23						1													1
23.2		1								1								1
23.4						1		1									1
23.6				1											1
23.8	1					1	1													1
24								1										1
24.2						1								Exit Refuge
24.4															1
24.6	1					1														1
24.8													1
25							1							1					1
25.2				1		1														1
25.4								1						1	1		1
25.6																				1
25.8		1		1						1								1
26															1					1
26.2						1
26.4	1	1					1			1						1
26.6
26.8						1									1		1		Under Refuge
27	1												1						Under Refuge	1
27.2																			Under Refuge
27.4								1											Under Refuge
27.6																			Under Refuge
27.8		1								1									Under Refuge	1
28	1			1												1	1		Under Refuge
28.2		1	1							1									Under Refuge	1
28.4							1								1				Under Refuge
28.6													1						Under Refuge
28.8	1																		Under Refuge
29																	1		Under Refuge	1
29.2		1						1		1	Exit Refuge								Under Refuge
29.4													1						Under Refuge	1
29.6	1			1							1						1		Under Refuge
29.8							1						1		1				Under Refuge
30						1													Under Refuge	1
30.2	1	1	1							1	1								Under Refuge
30.4																			Under Refuge
30.6		1								1		1							Under Refuge	1
30.8	1	1					1			1				1			1		Under Refuge
31																			Under Refuge
31.2						1		1							1				Under Refuge
31.4	1										1								Under Refuge
31.6														1					Under Refuge
31.8	1																		1	1
32		1	1							1		1
32.2							1						1							1
32.4															1
32.6	1	1				1				1
32.8															1
33				1												1	1
33.2		1	1					1		1										1
33.4	1						1												1
33.6													1				1
33.8		1								1		1
34											1	1
34.2															1
34.4				1				1						1			1			1
34.6			1
34.8		1					1			1									1
35	1
35.2		1								1			1							1
35.4																	1
35.6	1					1
35.8							1									1				1
36	1	1								1					1		1		1
36.2
36.4			1			1														1
36.6				1			1		1		1
36.8	1	1								1			1
37												1			1					1
37.2		1								1				1					1
37.4				1			1						1				1
37.6		1				1		1		1										1
37.8
38			1										1		1					1
38.2		1								1	1			1			1
38.4	1														1
38.6	1	1	1					1		1
38.8						1	1
39	1												1				1		1	1
39.2															1
39.4	1	1				1				1
39.6				1
39.8	1	1	1				1			1					1				1
40																				1
40.2						1		1							1		1		1
40.4		1								1	1			1		1
40.6				1			1		1
40.8															1					1
41
41.2		1		1						1			1							1
41.4		1				1				1									1
41.6									Under Refuge					1			1
41.8			1	1			1	1	Under Refuge
42	1	1							Under Refuge	1			1		1
42.2									Under Refuge
42.4		1		1					Under Refuge	1
42.6	1								Under Refuge					1
42.8									Under Refuge						1		1
43		1							Under Refuge	1
43.2									Under Refuge										1
43.4			1				1		Under Refuge					1
43.6									Under Refuge		1	1
43.8						1			Under Refuge
44								1	Under Refuge								1
44.2	1			1			1		Under Refuge					1						1
44.4									Under Refuge
44.6		1							Under Refuge	1				1			1
44.8						1	1		Under Refuge
45	1		1						Under Refuge
45.2		1							Under Refuge	1
45.4				1					Under Refuge			1	1	1						1
45.6		1							Under Refuge	1	1
45.8								1	Under Refuge
46	1		1						Under Refuge								1
46.2		1							Under Refuge	1			1
46.4			1						Under Refuge						1
46.6		1							Under Refuge	1				1					1
46.8									Under Refuge
47						1			1
47.2												1					1			1
47.4			1				1	1						1
47.6											1						1
47.8		1				1				1					1
48	1		1	1
48.2						1
48.4											1					1		1	1
48.6		1								1					1
48.8			1					1						1			1
49						1
49.2											1	1
49.4															1					1
49.6																			1
49.8		1						1		1				1						1
50
50.2			1									1	1		1					1
50.4											1			1			1		1
50.6			1	1				1												1
50.8															1
51						1		1									1
51.2
51.4		1								1					1	1			1	1
51.6						1											1
51.8											1									1
52	1					1								1
52.2	1		1				1		Under Refuge		1
52.4				1		1			Under Refuge						1		1
52.6									Under Refuge										1	1
52.8	1								Under Refuge					1	1		1
53						1		1	Under Refuge										1
53.2		1							Under Refuge	1				1
53.4									Under Refuge				1							1
53.6	1			1					Under Refuge								1
53.8	1								Under Refuge
54						1	1	1	Under Refuge							1
54.2		1							Under Refuge	1										1
54.4			1						Under Refuge
54.6		1							Under Refuge	1		Under Refuge		1
54.8									Under Refuge			Under Refuge					1		1	1
55				1					Under Refuge			Under Refuge
55.2									Under Refuge			Under Refuge	1		1		1
55.4	1	1						1	Under Refuge	1		Under Refuge							1
55.6	1								Under Refuge			Under Refuge
55.8				1			1		Under Refuge			Under Refuge		1			1
56									Under Refuge			Under Refuge
56.2		1							Under Refuge	1		Under Refuge			1
56.4	1	1							Under Refuge	1		Under Refuge								1
56.6				1				1	Under Refuge		1	Under Refuge
56.8	1					1			Under Refuge			1					1
57									Under Refuge
57.2	1	1						1	Under Refuge	1							1			1
57.4									Under Refuge				1
57.6		1							Under Refuge	1				1
57.8									Under Refuge		1				1					1
58									Under Refuge			1				1
58.2	1	1		1					Under Refuge	1					1		1
58.4									Under Refuge
58.6						1			Under Refuge			1
58.8	1	1							Under Refuge	1							1
59									Under Refuge						1					1
59.2		1				1			Under Refuge	1	1						1		1
59.4	1								Under Refuge			1								1
59.6			1						Under Refuge								1
59.8									Under Refuge					1
60									Under Refuge
60.2								1	Under Refuge		1					1				1
60.4									Under Refuge
60.6	1		1						Under Refuge					1
60.8	1								Under Refuge		1						1			1
61	1		1						Under Refuge						1					1
61.2									Under Refuge					1
61.4									Under Refuge
61.6									Under Refuge			1		1						1
61.8		1							Under Refuge	1							1		1
62									Under Refuge
62.2	1						1		Under Refuge											1
62.4									Under Refuge			1
62.6									Under Refuge		1			1		1
62.8	1		1						Under Refuge
63	1								Under Refuge			1
63.2						1			Under Refuge										1
63.4		1					1	1	Under Refuge	1
63.6		1							Under Refuge	1								1
63.8						1		1	Under Refuge											1
64									Under Refuge
64.2	1	1						1	Under Refuge	1										1
64.4									Under Refuge										Under Refuge
64.6				1					Under Refuge							1			Under Refuge
64.8		1					1	1	Under Refuge	1	1			1					Under Refuge
65	1					1			Under Refuge				1						Under Refuge
65.2									Under Refuge			1			1		1		Under Refuge	1
65.4				1				1	Under Refuge									1	Under Refuge
65.6		1							Under Refuge	1	1								Under Refuge
65.8									Under Refuge			1							Under Refuge
66				1					Under Refuge										Under Refuge	1
66.2							1		Under Refuge					1					Under Refuge
66.4								1	Under Refuge										Under Refuge
66.6		1							Under Refuge	1		1				1			Under Refuge
66.8	1								Under Refuge										Under Refuge
67								1	Under Refuge		1			1					Under Refuge
67.2		1		1					Under Refuge	1									Under Refuge
67.4			1						Under Refuge										Under Refuge	1
67.6		1				1			Under Refuge	1									Under Refuge
67.8							1	1	Under Refuge			1							Under Refuge
68									Under Refuge										Under Refuge	1
68.2				1					Under Refuge					1					Under Refuge
68.4		1							Under Refuge	1	1								Under Refuge	1
68.6						1			Under Refuge			1		1					1
68.8		1							Under Refuge	1					1				1
69				1					Under Refuge											1
69.2	1	1							Under Refuge	1	1
69.4							1	1	Under Refuge
69.6						1			Under Refuge
69.8									Under Refuge							1
70									Under Refuge			1					1
70.2	1	1		1				1	Under Refuge	1
70.4									Under Refuge		1
70.6		1							Under Refuge	1			1
70.8									Under Refuge
71	1								Under Refuge					1					1	1
71.2						1			Under Refuge								1
71.4	1	1		1					Under Refuge	1	1								1
71.6									Under Refuge
71.8									1
72		1						1		1										1
72.2																	1		1	1
72.4
72.6
72.8			1										1
73				1							1
73.2	1						1					1		1			1
73.4
73.6			1			1		1	1
73.8	1														1
74								1											1
74.2		1	1							1			1							1
74.4	1			1								1					1
74.6		1					1			1
74.8		1	1					1		1	1	1
75						1
75.2	1			1				1					1
75.4		1								1									1
75.6								1			1
75.8	1			1			1								1					1
76		1	1					1		1		1
76.2		1		1						1						1				1
76.4	1											1	1				1
76.6		1		1					1	1	1
76.8			1				1	1
77	Under Refuge													1					1
77.2	Under Refuge	1								1					1		1
77.4	Under Refuge
77.6	Under Refuge	1	1	1						1		1					1
77.8	1					1								1		1				1
78		1						1		1	1
78.2															1
78.4							1										1
78.6	1	1	1					1		1
78.8												1
79	1							1						1	1	1			1	1
79.2		1		1			1			1
79.4			1
79.6	1	1								1
79.8															1		1
80		1			1	1			Under Refuge	1
80.2			1						Under Refuge							1
80.4						1			Under Refuge					1			1		1
80.6	1	1						1	Under Refuge	1
80.8							1		Under Refuge										1
81																				1
81.2			Under Refuge								1
81.4	1		Under Refuge									1			1
81.6			Under Refuge						1								1			1
81.8			Under Refuge			1	1
82			Under Refuge								1					1
82.2	1		Under Refuge					1							1
82.4		1	Under Refuge			1				1		1	1
82.6			Under Refuge											1	1
82.8			Under Refuge														1		1	1
83	1		Under Refuge				1
83.2			Under Refuge
83.4		1	Under Refuge							1						1
83.6	1		1		1								1
83.8			1
84						1						1					1
84.2														1						1
84.4
84.6							1		1						1		1		1
84.8	1							1						1						1
85
85.2															1					1
85.4				Under Refuge
85.6	1			Under Refuge		1											1
85.8		1		Under Refuge					1	1					1	1
86				Under Refuge	1			1
86.2				Under Refuge								1			1		1	1
86.4	1			Under Refuge			1				1			1						1
86.6				Under Refuge				1
86.8				Under Refuge
87				Under Refuge
87.2	1	1	1	Under Refuge						1					1		1
87.4				Under Refuge			1						1	1						1
87.6	1			Under Refuge		1					1
87.8				Under Refuge								1			1			1
88				1				1								1	1
88.2
88.4								1			1								1
88.6		1			1					1					1		1			1
88.8				1							1			1
89						1		1				1	1				1
89.2	1	1					1			1					1
89.4			1															1	1
89.6															1		1
89.8	1			1	1	1		1					1	1
90									1										1	1
90.2								1							1		1
90.4
90.6		1	1	1						1	1						1	1
90.8								1						1						1
91						1										1
91.2		1						1		1			1		1
91.4	1													1
91.6	1														1		1		1
91.8									1											1
92		1					1	1		1	1
92.2			1										1		1				1
92.4				1				1				1
92.6	1				1	1									1		1			1
92.8														1		1		1
93				1					1								1
93.2		1	1							1	1
93.4							1								1
93.6								1												1
93.8						1			1										1
94																	1
94.2			1
94.4		1							1	1					1			1
94.6	1										1					1				1
94.8																	1
95							1		1				1
95.2						1		1								1
95.4															1					1
95.6							1	1
95.8									1		1							1
96														1			1			1
96.2			1	1									1		1
96.4					1						1									1
96.6								1	1
96.8		1								1							1		1	1
97	1													1	1	1
97.2		1							1	1	1
97.4			1					1				1								1
97.6				1											1
97.8	1												1
98																			1
98.2		1			1				1	1	1			1
98.4		1	1							1					1
98.6														1			1			1
98.8		1				1				1								1
99				1
99.2									1		1				1
99.4							1	1												1
99.6		1								1			1						Under Refuge
99.8																			Under Refuge
100														1	1				Under Refuge
100.2			1				1	1	1							1			Under Refuge
100.4		1			1					1	1							1	Under Refuge
100.6													1		1				Under Refuge
100.8																			Under Refuge
101		1		1						1	1								Under Refuge	1
101.2	1		1					1									1		1
101.4						1	1
101.6		1								1								1
101.8															1				1
102		1			1					1				1
102.2				1												1	1
102.4											1
102.6							1	1					1
102.8					1									1				1		1
103	1
103.2				1
103.4		1							1	1						1			1
103.6																	1			1
103.8	1		1	1							1
104					1														1
104.2		1							1	1					1
104.4														1			1
104.6		1								1
104.8						1		1
105	1																			1
105.2		1		1						1			1		1		1	1
105.4																				1
105.6		1			1					1									1
105.8
106								1						1				1	1	1
106.2		1		1		1				1
106.4	1				1		1								1
106.6						1			1
106.8							1							1
107		1						1		1					1					1
107.2											1					1
107.4			1										1
107.6																	1
107.8		1							1	1				1	1			1
108			1		1	1
108.2	1							1								1
108.4		1							1	1	1
108.6			1				1								1
108.8		1								1			1
109									1			1					1	1
109.2											1
109.4	1														1
109.6				On Refuge			1							1			1		1	1
109.8		1		On Refuge				1		1
110				On Refuge												1		1
110.2				On Refuge											1	1	1			1
110.4				On Refuge	1						1
110.6		1		On Refuge					1	1				1					1
110.8				On Refuge		1	1											1		1
111				On Refuge												1
111.2				On Refuge				1									1
111.4				On Refuge					1											1
111.6				On Refuge														1
111.8				On Refuge			1						1	1		1
112				On Refuge		1		1											1	1
112.2		1		On Refuge	1					1
112.4			1	On Refuge
112.6				On Refuge					1						1
112.8				On Refuge				1						1
113		1		On Refuge						1								1
113.2				On Refuge	1						1
113.4		1		On Refuge			1		1	1
113.6				On Refuge				1						1
113.8	1			On Refuge									1					1	1
114		1		On Refuge						1						1				1
114.2				On Refuge											1		1
114.4		1		On Refuge			1			1		1
114.6				On Refuge							1
114.8				On Refuge	1			1			1								1
115				On Refuge					1
115.2		1		1						1						1
115.4							1						1	1	1
115.6	1	1				1				1										1
115.8			1				1		1								1
116		1		1				1		1										1
116.2
116.4					1	1						1
116.6		1		1					1	1			1							1
116.8		1				1	1			1
117																1	1			1
117.2	1	1								1				1
117.4				1					1				1					1	1
117.6						1														1
117.8		1		1					1	1		1
118		1								1
118.2													1
118.4																1			1
118.6						1								1						1
118.8			1					1
119				1				1												1
119.2				1
119.4						1													1	1
119.6														1
119.8								1	1				1			1				1
120						1
120.2		1								1		1
120.4																	1	1
120.6			1						1											1
120.8								1					1	1
121						1			1
121.2							1					1					1
121.4																				1
121.6						1			1		1					1
121.8				1				1						1
122							1						1							1
122.2		1				1		1		1
122.4									1								1
122.6	1				1
122.8				1		1						1								1
123									1				1	1		1		1
123.2
123.4			1			1		1	1		1									1
123.6							1					1
123.8								1								1
124						1												1
124.2							1					1							1
124.4			1																	1
124.6				1									1
124.8						1			1											1
125		1	1	1			1			1				1
125.2	1
125.4		1								1	1			1
125.6									1			1						1		1
125.8				1		1
126			1						1
126.2											1		1
126.4							1							1		1			Under Refuge
126.6				1		1		1			1	1							Under Refuge
126.8		1								1									Under Refuge
127						1													Under Refuge
127.2																			Under Refuge
127.4				1		1						1							1
127.6								1	1									1
127.8					1		1									1			1	1
128						1											1
128.2												1
128.4			1			1			1											1
128.6	1			1					1					1
128.8											Under Refuge						1
129				1			1				Under Refuge								1
129.2											Under Refuge						1	1
129.4					1				1		Under Refuge	1
129.6								1			Under Refuge					1			1	1
129.8	1								1		Under Refuge
130											Under Refuge								1
130.2			1								Under Refuge	1		1
130.4											Under Refuge
130.6								1			Under Refuge
130.8									1		Under Refuge									1
131			1	1							Under Refuge
131.2									1		Under Refuge	1					Under Refuge		1	1
131.4		1			1					1	Under Refuge					1	Under Refuge
131.6											Under Refuge						Under Refuge
131.8											Under Refuge			1			Under Refuge			1
132											Under Refuge						Under Refuge
132.2				1							Under Refuge						Under Refuge			1
132.4					1				1		Under Refuge					1	Under Refuge
132.6		1								1	Under Refuge	1		1			Under Refuge	1
132.8											Under Refuge		1				Under Refuge		1
133											Under Refuge						Under Refuge
133.2			1						1		Under Refuge						Under Refuge			1
133.4	1			1				1			1						Under Refuge
133.6					1												1	1
133.8						1						1
134									1		1								1
134.2	1				1											1				1
134.4				1
134.6
134.8							1		1
135					1			1
135.2														1		1
135.4				1		1
135.6
135.8	1	1						1		1	1
136													1				1
136.2				1							1								1	1
136.4							1	1												1
136.6																1
136.8							1				1
137	1	1		1				1		1							1
137.2		1								1
137.4								1				1							1
137.6		1			1					1										1
137.8	1					1		1						1
138		1			1					1						1	1
138.2							1				1
138.4									1										1
138.6		1								1										1
138.8	1												1
139		1			1			1		1	1
139.2				1										1
139.4																	1			1
139.6	1	1								1
139.8								1									1			1
140							1
140.2		1	1	1						1
140.4	1										1					1
140.6									1				1				1
140.8		1						1		1		1
141											1						1
141.2														1				1
141.4		1			1				1	1							1
141.6													1			1
141.8		1		1		1				1	1	1					1			1
142							1												1
142.2	1											1								1
142.4									1				1
142.6
142.8								1			1	1		1
143						1			1											1
143.2												1				1
143.4					1
143.6									1					1			1	1		1
143.8	1																		1
144																1
144.2		1								1			1					1
144.4	1								1		1			1
144.6		1								1		1
144.8
145					1												1
145.2				1							1					1
145.4		1								1										1
145.6												1							1
145.8		1								1										1
146	1						1						1
146.2
146.4		1								1				1
146.6								1										1
146.8					1
147			1	1													On Refuge		1	1
147.2	1	1								1						1	On Refuge
147.4																	On Refuge
147.6											1			1			On Refuge			1
147.8								1				1					On Refuge
148																	On Refuge			1
148.2		1				1				1				1			On Refuge
148.4									1								On Refuge			1
148.6	1											1					On Refuge
148.8				Under Refuge							1						On Refuge		1
149		1		Under Refuge			1			1						1	On Refuge
149.2	1			Under Refuge					1								On Refuge
149.4				Under Refuge													On Refuge
149.6				Under Refuge							1	1		1			On Refuge		1
149.8		1		Under Refuge						1							On Refuge
150	1			Under Refuge													On Refuge	1
150.2				Under Refuge												1	On Refuge			1
150.4			1	Under Refuge										1			On Refuge
150.6	1			Under Refuge			1										On Refuge		1	1
150.8				Under Refuge					1								On Refuge
151		1		Under Refuge						1							On Refuge
151.2				Under Refuge				1									On Refuge
151.4				Under Refuge													On Refuge
151.6				Under Refuge					1								On Refuge			1
151.8	1			1	1		1							1			On Refuge
152											1	1					On Refuge		1
152.2				1													On Refuge
152.4						Under Refuge		1									1
152.6						Under Refuge			1							1		1
152.8						Under Refuge
153						Under Refuge											1			1
153.2				1		Under Refuge			1		1	1
153.4						Under Refuge								1		1	1		1
153.6				1	1	Under Refuge
153.8						Under Refuge														1
154		1			1	Under Refuge				1
154.2						Under Refuge	1		1							1
154.4	1					Under Refuge					1	1								1
154.6						Under Refuge												1
154.8						Under Refuge			1								1		1
155						Under Refuge		1	1											1
155.2		1				Under Refuge				1			1				1
155.4						Under Refuge
155.6						Under Refuge										1
155.8						Under Refuge											1		1
156						Under Refuge		1										1
156.2						Under Refuge	1							1
156.4					1	Under Refuge														1
156.6	1					Under Refuge											1
156.8						Under Refuge			1				1
157						Under Refuge					1					1
157.2		1				Under Refuge				1							1		1
157.4						Under Refuge								1						1
157.6						Under Refuge	1				1								1
157.8						Under Refuge
158						Under Refuge		1				1						1		1
158.2						Under Refuge
158.4						Under Refuge
158.6				1		Under Refuge											Under Refuge		1
158.8						Under Refuge			1			1					Under Refuge
159						Under Refuge							1				Under Refuge
159.2						1			1		1						Under Refuge
159.4					1			1									Under Refuge
159.6		1								1							Under Refuge
159.8									1								Under Refuge	1
160								1									1
160.2									1		1
160.4	1						1									1
160.6						1											1	1	On Refuge	1
160.8								1	1			1							On Refuge
161														1			1		On Refuge
161.2		1			1					1									On Refuge
161.4				1				1	1		1							1	1	1
161.6	1					1						1
161.8
162									1								1
162.2	1			1	1											1
162.4												1		1
162.6	1			1			1		1
162.8								1					1				1	1	1
163		1							1	1	1
163.2												1				1			Under Refuge	1
163.4	1						1												Under Refuge
163.6			1					1											Under Refuge
163.8											1					1			Under Refuge
164	1			1	1													1	Under Refuge
164.2																	1		Under Refuge	1
164.4		1					1	1	1	1						1			Under Refuge
164.6	1										1	1							Under Refuge
164.8					1				1								1		Under Refuge
165																		1	Under Refuge
165.2	1			1									1	1					Under Refuge
165.4		1								1							1		Under Refuge	1
165.6																			Under Refuge
165.8												1				1			Under Refuge
166					1						1								Under Refuge
166.2				1														1	Under Refuge	1
166.4		1								1		1							Under Refuge
166.6			1											1					Under Refuge
166.8							1										1		Under Refuge
167											1						1		Under Refuge
167.2												1	1			1		1	Under Refuge	1
167.4						1								Under Refuge					Under Refuge
167.6					1									Under Refuge					Under Refuge
167.8	1													Under Refuge			1		1
168		1								1				Under Refuge
168.2														Under Refuge		1				1
168.4			1											Under Refuge				1
168.6						1								Under Refuge			1		1
168.8									1					Under Refuge
169				1							1			Under Refuge		1
169.2	1													Under Refuge				1		1
169.4														Under Refuge					1
169.6														Under Refuge
169.8												Under Refuge		Under Refuge			1
170								1				Under Refuge		Under Refuge				1
170.2	1											Under Refuge		Under Refuge		1	1		1	1
170.4									1			Under Refuge		Under Refuge
170.6												Under Refuge		Under Refuge						1
170.8		1						1		1		Under Refuge		Under Refuge
171								1			1	Under Refuge		Under Refuge			1
171.2												Under Refuge		Under Refuge		1				1
171.4	1											Under Refuge		Under Refuge
171.6		1								1	Under Refuge	1		Under Refuge		1
171.8					1			1			Under Refuge			Under Refuge			1
172	1								1		Under Refuge			1						1
172.2						1					Under Refuge							1
172.4	1	1						1	1	1	Under Refuge					1			1
172.6		Under Refuge								Under Refuge	Under Refuge						1
172.8		Under Refuge			1			1		Under Refuge	Under Refuge	1	1					1
173		Under Refuge							1	Under Refuge	Under Refuge									1
173.2	1	Under Refuge								Under Refuge	Under Refuge
173.4		Under Refuge								Under Refuge	Under Refuge	1				1
173.6	1	Under Refuge								Under Refuge	Under Refuge			1			1	1
173.8		Under Refuge								Under Refuge	Under Refuge								1
174		Under Refuge						1		Under Refuge	Under Refuge						Under Refuge
174.2		Under Refuge								Under Refuge	Under Refuge	1					Under Refuge
174.4		Under Refuge								Under Refuge	Under Refuge						Under Refuge
174.6		Under Refuge	1						1	Under Refuge	Under Refuge						Under Refuge
174.8		1								1	Under Refuge						Under Refuge			1
175											Under Refuge	1					Under Refuge	1		1
175.2	1										Under Refuge						1
175.4		1					1			1	Under Refuge								1	1
175.6											Under Refuge						1
175.8			1								Under Refuge	1		1
176								1			Under Refuge
176.2	1										Under Refuge			1
176.4											Under Refuge	1
176.6	1	1								1	1					1
176.8						1													1
177					1						1
177.2				1								1							1
177.4		1								1							1
177.6			1	1																1
177.8											1
178								1								1
178.2	1	1			1		1	1		1		1		1				1
178.4	1		1										1
178.6																				1
178.8		1		1						1									1
179											1		1	1
179.2	1	1								1							1
179.4												1				1
179.6								1			1									1
179.8												1
180																	1
180.2					1														1
180.4	1			1			1		1			1	1
180.6																	1			1
180.8											1	1
181	1																	1
181.2			1	1				1									1			1
181.4									1		1								1
181.6		1					1			1				1
181.8	1																			1
182
182.2		1						1		1										1
182.4			1	1													1		1
182.6	1								1		1
182.8							1	1								1				1
183
183.2																	1			1
183.4																			1
183.6	1											1
183.8		1						1		1				1
184																1
184.2											1		1				1
184.4
184.6	1													1					1	1
184.8																	1
185						1		1				1
185.2	1																	1
185.4							1										1			1
185.6		1						1		1	1
185.8											1	1				1
186		1	1		1					1							1		1
186.2	1						1		Under Refuge				1				1
186.4				1					Under Refuge			1						1
186.6	1	1						1	Under Refuge	1
186.8			1						Under Refuge							1	1			1
187									Under Refuge										1
187.2						1			Under Refuge								1	1
187.4		1							Under Refuge	1										1
187.6				1					Under Refuge		1
187.8		1					1		Under Refuge	1
188	1				1				Under Refuge				1			1
188.2				1					Under Refuge								1
188.4			1						Under Refuge
188.6		1			1				Under Refuge	1	1							1	1
188.8									Under Refuge							1
189			1	1					Under Refuge
189.2							1	1	Under Refuge		1	1					1			1
189.4		1							1	1
189.6	1												1			1				1
189.8																	1		1
190																		1
190.2											1	1
190.4			1
190.6				1				1												1
190.8																1
191													1				1		1
191.2											1	1
191.4													1							1
191.6			1		1									1				1
191.8								1									1
192				1												1				1
192.2		1							1	1		1
192.4											1
192.6													1						1	1
192.8		1								1							1
193	1													1				1		1
193.2												1							1
193.4				1			1		1		1									1
193.6								1								1	1
193.8											1		1	1					1	1
194	1	1	1							1
194.2																				1
194.4									1					1					1
194.6	1			1		1		1					1							1
194.8
195				1							1							1
195.2																			1
195.4								1				1
195.6	1		1						Under Refuge				1			1
195.8									Under Refuge
196									Under Refuge			1						1		1
196.2		1						1	Under Refuge	1			1	1			1
196.4									Under Refuge
196.6									Under Refuge
196.8		1		1					Under Refuge	1									1	1
197							1		Under Refuge					1
197.2	1								Under Refuge			1
197.4									Under Refuge								1
197.6	1					1		1	Under Refuge										1	1
197.8			1						Under Refuge				1
198				1				1	Under Refuge								1
198.2	1								Under Refuge											1
198.4									Under Refuge								1	1
198.6	1	1			1				Under Refuge	1		1							1
198.8									Under Refuge								1	1
199				1				1	Under Refuge
199.2									Under Refuge				1						1
199.4					1				Under Refuge								1
199.6	1								Under Refuge
199.8	1			1				1	Under Refuge									1		1
200									Under Refuge		1			1		1	1		1
200.2		1							Under Refuge	1
200.4									Under Refuge											1
200.6								1	Under Refuge
200.8	1		1	1					Under Refuge		1					1	1	1
201									Under Refuge					1
201.2		1							Under Refuge	1									1	1
201.4	1						1		Under Refuge
201.6		1		1					Under Refuge	1										1
201.8								1	Under Refuge
202	1	1		1					Under Refuge	1						1	1
202.2									Under Refuge					1				1
202.4									Under Refuge			1							1	1
202.6							1		Under Refuge								1
202.8		1		1					Under Refuge	1
203	1					1			Under Refuge							1
203.2									Under Refuge			1					1		1
203.4									Under Refuge
203.6							1		Under Refuge				1				1			1
203.8	1	1		1	1				Under Refuge	1				1		1
204									Under Refuge
204.2			1	1		1			Under Refuge			1		1			1
204.4		1							Under Refuge	1									1	1
204.6					1				Under Refuge								1
204.8							1		Under Refuge
205		1							Under Refuge	1	1							1
205.2								1	Under Refuge					1						1
205.4				1			1		Under Refuge
205.6									Under Refuge			1
205.8		1							Under Refuge	1								1	1
206		1			1		1		Under Refuge	1
206.2	1			1					Under Refuge											1
206.4			1						Under Refuge							1			1
206.6		1							Under Refuge	1
206.8	1						1		Under Refuge
207					1			1	Under Refuge									1	1
207.2	1								Under Refuge					1						1
207.4		1							Under Refuge	1	1
207.6				1					Under Refuge							1				1
207.8		1	1						Under Refuge	1
208	1								Under Refuge
208.2		1							Under Refuge	1								1
208.4									Under Refuge		1
208.6	1				1		1		Under Refuge											1
208.8				1		1			Under Refuge							1			1
209									Under Refuge									1
209.2		1	1						Under Refuge	1										1
209.4	1			1					Under Refuge
209.6									Under Refuge										1
209.8									Under Refuge
210	1	1					1		Under Refuge	1						1		1		1
210.2									Under Refuge		1						1
210.4	1								Under Refuge
210.6						1			Under Refuge											1
210.8								1	Under Refuge										1
211		1							Under Refuge	1		1		1
211.2	1		1	1					Under Refuge									1
211.4					1				Under Refuge											1
211.6		1							Under Refuge	1	1
211.8	1								Under Refuge
212						1			Under Refuge											1
212.2	1								Under Refuge		1
212.4									Under Refuge
212.6									Under Refuge				1
212.8									Under Refuge
213									Under Refuge
213.2	1					1	1		Under Refuge					1
213.4									Under Refuge								1
213.6						1			Under Refuge
213.8								1	Under Refuge							1			1
214	1						1		Under Refuge											1
214.2					1				Under Refuge								1
214.4									Under Refuge					1
214.6									Under Refuge									1
214.8		1							Under Refuge	1									1
215	1								Under Refuge
215.2									Under Refuge							1
215.4									Under Refuge		1								1
215.6		1				1			Under Refuge	1
215.8									Under Refuge			1		1					1
216						1			Under Refuge
216.2			1						Under Refuge				1			1				1
216.4	1								Under Refuge										1
216.6		1					1		Under Refuge	1										1
216.8									Under Refuge
217									Under Refuge					1
217.2									Under Refuge								1	1
217.4		1				1			Under Refuge	1	1						On Refuge		1
217.6									Under Refuge								On Refuge			1
217.8									Under Refuge							1	On Refuge
218					1				Under Refuge								On Refuge	1	1
218.2		1							Under Refuge	1							On Refuge
218.4							1		Under Refuge								On Refuge		1
218.6			1						Under Refuge								On Refuge			1
218.8						1			Under Refuge		1						On Refuge
219									Under Refuge								On Refuge
219.2	1	1				1			Under Refuge	1			1				On Refuge
219.4							1		Under Refuge								On Refuge
219.6					1				Under Refuge		1					1	On Refuge			1
219.8		1	1			1			Under Refuge	1							On Refuge		1
220								1	Under Refuge					1			On Refuge
220.2	1								Under Refuge								On Refuge
220.4		1							Under Refuge	1							On Refuge
220.6									Under Refuge			1					On Refuge
220.8		1							Under Refuge	1						1	On Refuge		1
221									Under Refuge								On Refuge
221.2									Under Refuge								On Refuge
221.4	1				1				Under Refuge								On Refuge
221.6		1					1		Under Refuge	1		1		1			On Refuge
221.8	1								1								On Refuge			1
222		1	1							1			1			1	On Refuge
222.2																	On Refuge		1
222.4																	On Refuge	1
222.6	1	1							1	1	1						On Refuge
222.8																	1
223	1	1				1				1				1
223.2																				1
223.4							1		1		1		1						1
223.6				1
223.8		1			1					1						1	1
224								1	1
224.2		1	1							1				1
224.4													1						1
224.6	1																	1
224.8									1			1								1
225								1
225.2							1				1			1
225.4																		1	1
225.6			1													1				1
225.8					1												1
226		1								1							1	1
226.2
226.4				1				1				1
226.6																	1
226.8									1								1			1
227	Under Refuge		1											1				1
227.2	Under Refuge										1
227.4	Under Refuge								1										1	1
227.6	Under Refuge							1			1		1			1				Under Refuge
227.8	Under Refuge				1												1			Under Refuge
228	Under Refuge								1		1							1		Under Refuge
228.2	Under Refuge											1								Under Refuge
228.4	Under Refuge													1					1	Under Refuge
228.6	Under Refuge															1				Under Refuge
228.8	Under Refuge								1		1									Under Refuge
229	1		1				1						1				1		1	Under Refuge
229.2		1			1					1		1								Under Refuge
229.4																		1		Under Refuge
229.6	1													1					1	Under Refuge
229.8											1									Under Refuge
230	1															1				Under Refuge
230.2											1						1		1	Under Refuge
230.4																				Under Refuge
230.6								1											1	1
230.8	1	1							1	1		1		1		1		1
231
231.2			1			1											1		1
231.4	1			1							1							1
231.6																				1
231.8		1								1		On Refuge
232					1						1	On Refuge
232.2												On Refuge
232.4												On Refuge						1	1	1
232.6	1			1							1	On Refuge				1
232.8			1									On Refuge
233	1					1		1				On Refuge				1				1
233.2		1								1		On Refuge						1
233.4	1											On Refuge
233.6									1		1	On Refuge								1
233.8												On Refuge	1				1		1
234												On Refuge
234.2		1							1	1		On Refuge
234.4											1	On Refuge
234.6	1			1					1			On Refuge					1	1
234.8						1						On Refuge
235	1	1								1		On Refuge							1
235.2												On Refuge				1	1			1
235.4												On Refuge	1
235.6								1				On Refuge						1
235.8	1					1						On Refuge				1
236									Under Refuge			On Refuge		1						1
236.2		1							Under Refuge	1		On Refuge					1
236.4									Under Refuge			On Refuge
236.6	1				1				Under Refuge			On Refuge	1					1		1
236.8									Under Refuge			On Refuge							1
237				1			1		Under Refuge			On Refuge				1
237.2		1							Under Refuge	1		On Refuge						1	1	1
237.4	1								Under Refuge			On Refuge					1
237.6			1			1			Under Refuge			On Refuge
237.8					1				Under Refuge			On Refuge		1		1
238									Under Refuge			1						1		1
238.2							1		Under Refuge				1				1		1
238.4	1	1							Under Refuge	1
238.6					1	1			Under Refuge									1	1	1
238.8	1								Under Refuge			1
239									Under Refuge					1			Under Refuge		1	1
239.2									Under Refuge								Under Refuge
239.4		1							Under Refuge	1							Under Refuge
239.6									Under Refuge							1	Under Refuge
239.8	1				1		1		Under Refuge								Under Refuge	1
240									Under Refuge								Under Refuge		1	1
240.2	1		1						1				1				Under Refuge
240.4								1			1					1	Under Refuge
240.6	1																Under Refuge	1
240.8																1	1
241	1										1									1
241.2		1				1		1		1									1
241.4							1
241.6											1	1					Under Refuge
241.8	1								1					1		1	Under Refuge			1
242																	Under Refuge	1
242.2											1	1					Under Refuge		1
242.4			1														Under Refuge
242.6	1																1
242.8									1				1			1				1
243											1							1
243.2	1	1								1									1
243.4																		1	1
243.6									1
243.8				1													1			1
244											1					1		1
244.2					1															1
244.4	1								1
244.6																		1
244.8				1												1			1	1
245	1						1
245.2
245.4		1								1								1
245.6		1						1		1						1	1			1
245.8				1		1								1					1
246													1
246.2	1	1				1			1	1
246.4							1				1						1			1
246.6			1		1							1						1	1
246.8
247	1	1				1				1							1
247.2									1									1
247.4	1																			1
247.6						1			1			1					On Refuge
247.8														1			On Refuge	1	1
248		1								1			1				On Refuge
248.2							1	1									On Refuge			1
248.4	1	1		1						1							On Refuge
248.6								1				On Refuge				1	On Refuge
248.8						1			1			On Refuge					On Refuge	1	1
249			1									On Refuge		1			On Refuge			1
249.2									1			On Refuge					On Refuge
249.4				1	1							On Refuge					On Refuge
249.6		1					1	1	1	1		On Refuge				1	On Refuge
249.8												On Refuge	1				On Refuge	1	1
250	1					1						On Refuge					On Refuge
250.2							1				1	On Refuge					On Refuge			1
250.4									1			On Refuge					Under Refuge
250.6				1								On Refuge				1	Under Refuge		1
250.8						1	1					On Refuge	1				Under Refuge	1
251								1	1			On Refuge					Under Refuge
251.2	1											1	1				Under Refuge
251.4			1														Under Refuge			1
251.6				1			1		1							1	Under Refuge	1
251.8													1				Under Refuge			1
252					1			1									Under Refuge
252.2				1													Under Refuge	1
252.4		1					1		1	1						1	Under Refuge
252.6	1			1		1											Under Refuge			1
252.8							1		1			1					Under Refuge		1
253			1					1					1				1
253.2				1		1			1							1			1	1
253.4
253.6							1		1
253.8	1					1		1												1
254				1													1		1
254.2	1								1			1		1				1
254.4			1																	1
254.6				1			1	1					1
254.8																1
255	1																			1
255.2											1						1
255.4					1	1
255.6		1		1						1						1				1
255.8												1	1						1
256									1
256.2		1					1			1	1									1
256.4								1						1			1
256.6																		1
256.8		1				1	1			1									1
257				1				1	1		1	1
257.2		1			1					1							1
257.4			1					1					1					1
257.6											1			1						1
257.8		1						1	1	1							1
258	1						1													1
258.2							1		1		1		1
258.4				1				1									1			1
258.6					1		1
258.8		1						1		1
259						1			1										1
259.2	1											1		1
259.4								1								1		1
259.6																	1
259.8		1					1			1
260				1	1			1			1								1
260.2		1								1				1
260.4											1		1				1
260.6						1
260.8								1									1			Under Refuge
261	1																			Under Refuge
261.2		1							1	1	1									Under Refuge
261.4																1				Under Refuge
261.6			1											1			1			Under Refuge
261.8					1															Under Refuge
262									1							1				Under Refuge
262.2		1						1		1										Under Refuge
262.4				1									1	1						Under Refuge
262.6																				1
262.8			1
263	1	1								1								1
263.2					1						1			1						1
263.4			1	1		1						1				1
263.6					1								1				1		1
263.8														1						1
264									1
264.2	1	1	1							1
264.4						1	1
264.6			1	1													1			1
264.8		1								1	1
265														1		1
265.2	1											1							On Refuge
265.4					1		1									1		1	On Refuge
265.6						1											1		On Refuge
265.8											1								On Refuge
266				1					1					1		1		1	On Refuge
266.2																			On Refuge	1
266.4							1		1										On Refuge
266.6								1										1	On Refuge
266.8																	1		On Refuge
267	1										1					1			On Refuge
267.2																			On Refuge
267.4									1					1					On Refuge
267.6																			Under Refuge
267.8		1					1			1	1								Under Refuge	1
268								1					1				1		Under Refuge
268.2		1		On Refuge	1					1								1	Under Refuge
268.4	1			On Refuge					1										Under Refuge
268.6				On Refuge												1			Under Refuge
268.8				On Refuge													1		Under Refuge
269				On Refuge				1	1		1							1	Under Refuge
269.2				On Refuge	1														Under Refuge
269.4				On Refuge															Under Refuge
269.6				On Refuge				1	1								1		Under Refuge	1
269.8	1			On Refuge												1		1	Under Refuge
270			1	On Refuge															Under Refuge
270.2				On Refuge					1										Under Refuge	1
270.4				On Refuge				1					1	1					Under Refuge
270.6				On Refuge													1	1	Under Refuge
270.8				On Refuge												1			Under Refuge
271				On Refuge	1		1												Under Refuge	1
271.2				On Refuge														1	Under Refuge
271.4	On Refuge			On Refuge		1											1		Under Refuge
271.6	On Refuge			On Refuge							1								Under Refuge
271.8	On Refuge	1	1	On Refuge					1	1									Under Refuge
272	On Refuge			On Refuge				1					1			1			Under Refuge	1
272.2	On Refuge			On Refuge					1										Under Refuge
272.4	On Refuge			On Refuge							1							1	Under Refuge
272.6	On Refuge			On Refuge															Under Refuge
272.8	On Refuge		1	On Refuge							1		1			1	1		Under Refuge
273	On Refuge			1					1									1	Under Refuge
273.2	On Refuge																		Under Refuge
273.4	On Refuge				1			1			1								Under Refuge
273.6	On Refuge						1		1					1				1	Under Refuge
273.8	On Refuge																1		Under Refuge
274	On Refuge					1													Under Refuge
274.2	On Refuge	1			1					1		1				1			Under Refuge
274.4	On Refuge							1					1						Under Refuge
274.6	On Refuge								1		1								Under Refuge
274.8	On Refuge				1		1											1	Under Refuge	1
275	On Refuge							1											Under Refuge
275.2	On Refuge			1												1			Under Refuge
275.4	On Refuge																		Under Refuge
275.6	On Refuge					1					1							1	Under Refuge	1
275.8	1				1			1	1			1							Under Refuge
276																	1		Under Refuge
276.2				1															Under Refuge	1
276.4																1			Under Refuge
276.6	1				1						1								Under Refuge
276.8																		1	Under Refuge
277		1	1							1		1		1			1		Under Refuge	1
277.2								1								1			Under Refuge
277.4																			Under Refuge	1
277.6					1				1								1		Under Refuge
277.8																			Under Refuge
278											1					1		1	Under Refuge	1
278.2								1			1		1				1		Under Refuge
278.4	1				1	1								1					Under Refuge
278.6			1	1								1							Under Refuge
278.8							1												Under Refuge
279								1								1			Under Refuge	1
279.2						1												1	Under Refuge
279.4		1							1	1	1	1							Under Refuge	1
279.6	1		1														1		Under Refuge
279.8				1	1													1	Under Refuge
280								1											Under Refuge
280.2				1		1												1	Under Refuge
280.4							1										1		1
280.6	1			1								1
280.8											1					1	1	1		1
281		1				1				1				1					1
281.2	1																	1		1
281.4								1			1		1
281.6									1					1						1
281.8	1		1					1			1					1	1
282																				1
282.2		1								1	1								1
282.4																				1
282.6				1
282.8	1				1								1							1
283
283.2							1				1					1			1
283.4								1						1		1
283.6		1								1
283.8									1								1	1
284												1								1
284.2							1	1			1
284.4		1								1			1					1
284.6														1			1
284.8			1		1								1			1				1
285	1			1
285.2									1		1			1		1				1
285.4							1											1
285.6																				1
285.8				1			1				1		1						1
286																1
286.2	1		1		1	1	1	1	1					1				1		1
286.4
286.6
286.8							1	1				1								1
287			1															1
287.2	1			Under Refuge	1								1
287.4				Under Refuge							1							1	1	1
287.6		On Refuge		Under Refuge					1	On Refuge						1
287.8		On Refuge		Under Refuge						On Refuge								1		1
288		On Refuge		Under Refuge		1				On Refuge			1			1	1
288.2	1	On Refuge	1	Under Refuge			1			On Refuge								1
288.4		On Refuge		Under Refuge				1		On Refuge										1
288.6		On Refuge	1	Under Refuge						On Refuge				1		1	1
288.8		On Refuge		Under Refuge						On Refuge								1
289		On Refuge		Under Refuge				1		On Refuge
289.2	1	On Refuge		Under Refuge						On Refuge
289.4				Under Refuge	1
289.6				Under Refuge									1				1
289.8				Under Refuge							1								1	1
290				Under Refuge				1	1							1
290.2		1		Under Refuge		1				1
290.4				Under Refuge									1	1				1
290.6				1				1			1
290.8		1					1			1
291	1				1				1											1
291.2			1								1							1
291.4				1				1
291.6																			Under Refuge
291.8									1					1			1		Under Refuge
292			1	1									1						Under Refuge	1
292.2		1								1	1								1
292.4
292.6			1		1		1		1
292.8
293								1			1
293.2									1											1
293.4			1													1
293.6													1
293.8					1
294						1		1
294.2		1		1			1			1				1
294.4			1						1		1
294.6																1
294.8					1							1		1						1
295													1				1
295.2				1		1		1	1											1
295.4							1				1
295.6		1								1
295.8																1		1		1
296			1						1
296.2		1		1		1		1		1
296.4					1						1							1	1
296.6	1						1							1
296.8			1
297						1		1				1	1						1
297.2				1																1
297.4																		1
297.6						1	1	1	1
297.8											1	1
298	1	1							1	1				1		1
298.2																			1
298.4					1													1
298.6							1				1					1				1
298.8	1				1	1						1
299		1								1
299.2				1			1						1
299.4						1		1												1
299.6											1			1
299.8			1						On Refuge				1							1
300									On Refuge		1	1						1
300.2							1		On Refuge
300.4	1								On Refuge											1
		Start Trial
		Exit Refuge
		1
		1
		1
		1
		1
		1
		1
		1
		1
		1
		1
		1
		1
		1
		1
		1
		1
		1
		1
		1
		1
		1
		1
		1
		1
		1
		1
		1
		1
		1
		1
		1
		1
		1
		1
		1
		1
		1
		1
		1
		1
		1
		1
		1
		1
		1
		1
		1
		1
		1
		1
		1
		1
		1
		1
		1
		1
		1
		1
		1
		1
		1
		1
		1
		1
		1
		1
		1
		1
		1
		1
		1
		1
		1
		1
		1
		1
		1
		1
		1
		1
		1
		1
		1
		1
		1
		1
		1
		1
		1
		1
		1
		1
		1
		1
		1
		1
		1
		1
		1
		1
		1
		1
		1
		1
		1
		1
		1
		1
		1
		1
		1
		1
		1
		1
		1
		1
		1
		1
		1
		1
		1
		1
		1
		1
		1
		1
		1
		1
		1
		1
		1
		1
		1
		1
		1
		1
		1
		1
		1
		1
		1
		1
		1
		1
		1
		1
		1
		1
		Under Refuge
		Under Refuge
		Under Refuge
		Under Refuge
		Under Refuge
		Under Refuge
		Under Refuge
		Under Refuge
		Under Refuge
		Under Refuge
		Under Refuge
		Under Refuge
		Under Refuge
		Under Refuge
		Under Refuge
		Under Refuge
		Under Refuge
		1
		1
		1
		1
		1
		1
		1
		1
		1

## Sheet: Calculations
species	colony	trial	exitrefuge	newsquare	underrefuge	onrefuge	tempo
BR	CRC170519-01	1	28.2	158	0	0	0.58131
BR	CRC170519-01	2	28	121	0	0	0.444853
BR	CRC170519-01	3	2.6	216	13.8	5.6	0.776978
BR	CRC170519-01	4	37	75	0	0	0.285171
BR	CRC170519-01	5	2	185	10.2	0	0.642808
BR	CRC170519-03	1	0.8	137	35.8	0	0.520121
BR	CRC170519-03	2	11.2	168	0	0	0.581717
BR	CRC170519-03	3	2.2	90	45.8	0	0.357143
BR	CRC170519-03	4	2	137	9.2	0	0.474377
BR	CRC170519-03	5	16	65	145.8	0	0.470333
BR	MS170505-01	1	0.2	106	2.8	0	0.356902
BR	MS170505-01	2	3.4	138	0	22	0.502549
BR	MS170505-01	3	6.2	100	0	0	0.340368
BR	MS170505-01	4	1	113	0	10.4	0.391545
BR	MS170505-01	5	4.8	194	7.4	0	0.674079
BR	RMMA100629-15	1	1.6	186	0	0	0.623324
BR	RMMA100629-15	2	3.2	67	34	0	0.254947
BR	RMMA100629-15	3	15.4	153	28.4	0	0.59719
BR	RMMA100629-15	4	1.2	144	4.8	0	0.489796
BR	RMMA100629-15	5	43.6	85	80.8	0	0.484055
LB	CRC170513-04	1	4.6	260	2.8	4.4	0.902151
LB	CRC170513-04	2	0.2	301	2.2	1.8	1.01758
LB	CRC170513-04	3	12.2	141	2.4	0	0.494043
LB	CRC170513-04	4	8.6	180	9	10.4	0.661765
LB	CRC170513-04	5	1.4	117	0	0	0.391829
LB	CRC170513-10	1	0.2	179	6.8	0	0.610922
LB	CRC170513-10	2	1	178	0	0	0.595318
LB	CRC170513-10	3	11	221	0	0	0.764706
LB	CRC170513-10	4	3.6	170	59.6	0.8	0.720339
LB	CRC170513-10	5	0.2	301	2.2	1.8	1.01758
LB	CRC170515-05	1	29.2	194	9.6	0	0.742726
LB	CRC170515-05	2	1.4	161	4	8.8	0.563331
LB	CRC170515-05	3	2.8	141	0	0	0.474428
LB	CRC170515-05	4	24.2	174	4.6	0	0.641593
LB	CRC170515-05	5	0.2	104	4.2	0	0.351827
LB	CRC170515-06	1	0.6	178	0	0	0.594522
LB	CRC170515-06	2	3	243	10.4	13.6	0.89011
LB	CRC170515-06	3	0.4	181	0	0	0.604139
LB	CRC170515-06	4	11	192	29.8	3.2	0.75
LB	CRC170515-06	5	0.2	331	4.8	0	1.12203

## Sheet: Change in Pace
species	colony	trial	first	last	difference
BR	CRC170519-01	1	36	12	24
BR	CRC170519-01	2	27	7	20
BR	CRC170519-01	3	40	21	19
BR	CRC170519-01	4	20	0	20
BR	CRC170519-01	5	44	30	14
BR	CRC170519-03	1	35	10	25
BR	CRC170519-03	2	38	17	21
BR	CRC170519-03	3	8	12	-4
BR	CRC170519-03	4	38	16	22
BR	CRC170519-03	5	1	17	-16
BR	MS170505-01	1	9	20	-11
BR	MS170505-01	2	31	20	11
BR	MS170505-01	3	22	4	18
BR	MS170505-01	4	20	13	7
BR	MS170505-01	5	46	19	27
BR	RMMA100629-15	1	22	12	10
BR	RMMA100629-15	2	2	7	-5
BR	RMMA100629-15	3	29	19	10
BR	RMMA100629-15	4	24	19	5
BR	RMMA100629-15	5	5	0	5
LB	CRC170513-04	1	61	25	36
LB	CRC170513-04	2	74	29	45
LB	CRC170513-04	3	31	20	11
LB	CRC170513-04	4	39	19	20
LB	CRC170513-04	5	6	29	-23
LB	CRC170513-10	1	56	23	33
LB	CRC170513-10	2	39	29	10
LB	CRC170513-10	3	43	31	12
LB	CRC170513-10	4	5	33	-28
LB	CRC170513-10	5	74	29	45
LB	CRC170515-05	1	39	14	25
LB	CRC170515-05	2	29	16	13
LB	CRC170515-05	3	26	24	2
LB	CRC170515-05	4	43	14	29
LB	CRC170515-05	5	56	0	56
LB	CRC170515-06	1	15	35	-20
LB	CRC170515-06	2	53	30	23
LB	CRC170515-06	3	26	39	-13
LB	CRC170515-06	4	35	11	24
LB	CRC170515-06	5	68	48	20

## Sheet: Descriptive Stats
Species	Variable	Mean	Std	Variance
BR	Exit Refuge	10.53	13.2957	176.776
BR	New Squares	131.9	44.3585	1967.67
BR	Under Refuge	20.94	36.1453	1306.48
BR	On Refuge	1.9	5.38673	29.0168
LB	Exit Refuge	5.8	8.22986	67.7305
LB	New Squares	197.35	61.4503	3776.13
LB	Under Refuge	7.62	13.9691	195.136
LB	On Refuge	2.24	4.01922	16.1541
Species	Variable	Mean	Std	Variance
BR	First	24.85	14.0685	197.924
BR	Last	13.75	7.58027	57.4605
BR	Difference	11.1	12.3753	153.147
LB	First	40.9	20.3234	413.042
LB	Last	24.9	10.8186	117.042
LB	Difference	16	23.2175	539.053
Gap between first and last minute=196.4s
