# Supplementary material for: Using an integrative taxonomic approach to delimit a sibling species, Mycetomoellerius mikromelanos sp. nov. (Formicidae: Attini: Attina)
Source: PeerJ. 2021 Jun 24;9:e11622. doi: 10.7717/peerj.11622 (PMC8236233; doi:10.7717/peerj.11622)
Supplement: Supplemental Information 27 [file peerj-09-11622-s027.xlsx]

## Sheet: workers
		Relative Retention time
peak		Peak 1: E- b- farnesene	Peak 2: (3Z,6E)- -a-farnesene	Peak 3: (3E,6E) -a-farnesene
Species	Collection Number
Workers		Farn.1	Farn.2	Farn.3
mikromelanos	CRC1170515-06	3.6	3.8	86
mikromelanos	CRC170515-05	4.5	3.5	56.7
mikromelanos	CRC170518-01	3	3.2	88.8
mikromelanos	CRC170508-01	4.15	3.93	88.63
mikromelanos	CRC15-06-W-G	9.15	0	80
mikromelanos	CRC18-08W-G	56.95	33.74	9.31
zeteki	MS170505-05	22.8	49.1	9
zeteki	RMMA12-15Wk-G	84	2.5	4.3
zeteki	CRC170519-01	56.1	17.3	4.6
zeteki	RMMA170529-15	86.13	4.96	8.18
mikromelanos	sp average	13.5583	8.02833	68.24
zeteki	sp average	62.2575	18.465	6.52
