# Supplementary material for: Using an integrative taxonomic approach to delimit a sibling species, Mycetomoellerius mikromelanos sp. nov. (Formicidae: Attini: Attina)
Source: PeerJ. 2021 Jun 24;9:e11622. doi: 10.7717/peerj.11622 (PMC8236233; doi:10.7717/peerj.11622)
Supplement: Supplemental Information 29 — All specimens indicated in the manuscript with the associated specimen code, collection code, type status, and repository. [file peerj-09-11622-s029.xlsx]

## Sheet: Sheet1
specimen_code	collection_code	Genus	species	life_stage	type_status	repository
USNMENT01123723	CRC170513-04	Mycetomollerius	mikromelanos	worker	Holotype	National Museum of Natural History, United States of America
USNMENT01123726	CRC170513-04	Mycetomollerius	mikromelanos	worker	paratype	National Museum of Natural History, United States of America
USNMENT01123727	CRC170513-04	Mycetomollerius	mikromelanos	worker	paratype	National Museum of Natural History, United States of America
USNMENT01123728	CRC170513-04	Mycetomollerius	mikromelanos	worker	paratype	National Museum of Natural History, United States of America
OSUC 640618	CRC170513-04	Mycetomollerius	mikromelanos	worker	paratype	Museu de Zoologia da Universidade de São Paulo, Brazil
OSUC 640619	CRC170513-04	Mycetomollerius	mikromelanos	worker	paratype	Museu de Zoologia da Universidade de São Paulo, Brazil
OSUC 640620	CRC170513-04	Mycetomollerius	mikromelanos	worker	paratype	Museu de Zoologia da Universidade de São Paulo, Brazil
OSUC 640621	CRC170513-04	Mycetomollerius	mikromelanos	worker	paratype	Museu de Zoologia da Universidade de São Paulo, Brazil
OSUC 640635	CRC170513-04	Mycetomollerius	mikromelanos	worker	paratype	Smithsonian Tropical Research Institute Panama, Panama
OSUC 640636	CRC170513-04	Mycetomollerius	mikromelanos	worker	paratype	Smithsonian Tropical Research Institute Panama, Panama
OSUC 640637	CRC170513-04	Mycetomollerius	mikromelanos	worker	paratype	Smithsonian Tropical Research Institute Panama, Panama
OSUC 640638	CRC170513-04	Mycetomollerius	mikromelanos	worker	paratype	Smithsonian Tropical Research Institute Panama, Panama
OSUC 640639	CRC170513-04	Mycetomollerius	mikromelanos	worker	paratype	Smithsonian Tropical Research Institute Panama, Panama
OSUC 640606	CRC170513-04	Mycetomollerius	mikromelanos	worker	paratype	The Ohio State University Museum of Biological Diversity Triplehorn Insect Collection, United States of America
OSUC 640607	CRC170513-04	Mycetomollerius	mikromelanos	worker	paratype	The Ohio State University Museum of Biological Diversity Triplehorn Insect Collection, United States of America
OSUC 640608	CRC170513-04	Mycetomollerius	mikromelanos	worker	paratype	The Ohio State University Museum of Biological Diversity Triplehorn Insect Collection, United States of America
USNMENT01123724	CRC170513-04	Mycetomollerius	mikromelanos	gyne	paratype	National Museum of Natural History, United States of America
USNMENT01123729	CRC170513-04	Mycetomollerius	mikromelanos	gyne	paratype	National Museum of Natural History, United States of America
USNMENT01123730	CRC170513-04	Mycetomollerius	mikromelanos	gyne	paratype	National Museum of Natural History, United States of America
USNMENT01123731	CRC170513-04	Mycetomollerius	mikromelanos	gyne	paratype	National Museum of Natural History, United States of America
OSUC 640622	CRC170513-04	Mycetomollerius	mikromelanos	gyne	paratype	Museu de Zoologia da Universidade de São Paulo, Brazil
OSUC 640623	CRC170513-04	Mycetomollerius	mikromelanos	gyne	paratype	Museu de Zoologia da Universidade de São Paulo, Brazil
OSUC 640624	CRC170513-04	Mycetomollerius	mikromelanos	gyne	paratype	Museu de Zoologia da Universidade de São Paulo, Brazil
OSUC 640640	CRC170513-04	Mycetomollerius	mikromelanos	gyne	paratype	Smithsonian Tropical Research Institute Panama, Panama
OSUC 640641	CRC170513-04	Mycetomollerius	mikromelanos	gyne	paratype	Smithsonian Tropical Research Institute Panama, Panama
OSUC 640642	CRC170513-04	Mycetomollerius	mikromelanos	gyne	paratype	Smithsonian Tropical Research Institute Panama, Panama
OSUC 640609	CRC170513-04	Mycetomollerius	mikromelanos	gyne	paratype	The Ohio State University Museum of Biological Diversity Triplehorn Insect Collection, United States of America
USNMENT01123725	CRC170513-04	Mycetomollerius	mikromelanos	male	paratype	National Museum of Natural History, United States of America
USNMENT01123732	CRC170513-04	Mycetomollerius	mikromelanos	male	paratype	National Museum of Natural History, United States of America
USNMENT01129733	CRC170513-04	Mycetomollerius	mikromelanos	male	paratype	National Museum of Natural History, United States of America
USNMENT01129734	CRC170513-04	Mycetomollerius	mikromelanos	male	paratype	National Museum of Natural History, United States of America
OSUC 640625	CRC170513-04	Mycetomollerius	mikromelanos	male	paratype	Museu de Zoologia da Universidade de São Paulo, Brazil
OSUC 640643	CRC170513-04	Mycetomollerius	mikromelanos	male	paratype	Smithsonian Tropical Research Institute Panama, Panama
OSUC 640610	CRC170513-04	Mycetomollerius	mikromelanos	male	paratype	The Ohio State University Museum of Biological Diversity Triplehorn Insect Collection, United States of America
USNMENT01129855	856 NAWeber	Mycetomollerius	zeteki	worker	lectotype	Museum of Comparative Zoology, United States of America
MCZ-ENT 00025619	856 NAWeber	Mycetomollerius	zeteki	worker	paralectotype	Museum of Comparative Zoology, United States of America
ANTWEB CASENT 0912534	3441 NAWeber	Mycetomollerius	zeteki	worker	NA	Natural History Musume Basel, Switzerland
762 USNM	No756 NAWeber	Mycetomollerius	zeteki	worker	NA	Museum of Comparative Zoology, United States of America
USNMENT01123712	RMMA100629-15	Mycetomollerius	zeteki	worker	NA	National Museum of Natural History, United States of America
USNMENT01123717	RMMA100629-15	Mycetomollerius	zeteki	worker	NA	National Museum of Natural History, United States of America
USNMENT01123718	RMMA100629-15	Mycetomollerius	zeteki	worker	NA	National Museum of Natural History, United States of America
USNMENT01123719	RMMA100629-15	Mycetomollerius	zeteki	worker	NA	National Museum of Natural History, United States of America
OSUC 640611	RMMA100629-15	Mycetomollerius	zeteki	worker	NA	Museu de Zoologia da Universidade de São Paulo, Brazil
OSUC 640612	RMMA100629-15	Mycetomollerius	zeteki	worker	NA	Museu de Zoologia da Universidade de São Paulo, Brazil
OSUC 640613	RMMA100629-15	Mycetomollerius	zeteki	worker	NA	Museu de Zoologia da Universidade de São Paulo, Brazil
OSUC 640614	RMMA100629-15	Mycetomollerius	zeteki	worker	NA	Museu de Zoologia da Universidade de São Paulo, Brazil
OSUC 640626	RMMA100629-15	Mycetomollerius	zeteki	worker	NA	Smithsonian Tropical Research Institute Panama, Panama
OSUC 640627	RMMA100629-15	Mycetomollerius	zeteki	worker	NA	Smithsonian Tropical Research Institute Panama, Panama
OSUC 640628	RMMA100629-15	Mycetomollerius	zeteki	worker	NA	Smithsonian Tropical Research Institute Panama, Panama
OSUC 640629	RMMA100629-15	Mycetomollerius	zeteki	worker	NA	Smithsonian Tropical Research Institute Panama, Panama
OSUC 640630	RMMA100629-15	Mycetomollerius	zeteki	worker	NA	Smithsonian Tropical Research Institute Panama, Panama
OSUC 640601	RMMA100629-15	Mycetomollerius	zeteki	worker	NA	The Ohio State University Museum of Biological Diversity Triplehorn Insect Collection, United States of America
OSUC 640602	RMMA100629-15	Mycetomollerius	zeteki	worker	NA	The Ohio State University Museum of Biological Diversity Triplehorn Insect Collection, United States of America
OSUC 640603	RMMA100629-15	Mycetomollerius	zeteki	worker	NA	The Ohio State University Museum of Biological Diversity Triplehorn Insect Collection, United States of America
USNMENT01123712	RMMA100629-15	Mycetomollerius	zeteki	gyne	NA	National Museum of Natural History, United States of America
USNMENT01123717	RMMA100629-15	Mycetomollerius	zeteki	gyne	NA	National Museum of Natural History, United States of America
USNMENT01123718	RMMA100629-15	Mycetomollerius	zeteki	gyne	NA	National Museum of Natural History, United States of America
USNMENT01123719	RMMA100629-15	Mycetomollerius	zeteki	gyne	NA	National Museum of Natural History, United States of America
OSUC 640615	RMMA100629-15	Mycetomollerius	zeteki	gyne	NA	Museu de Zoologia da Universidade de São Paulo, Brazil
OSUC 640616	RMMA100629-15	Mycetomollerius	zeteki	gyne	NA	Museu de Zoologia da Universidade de São Paulo, Brazil
OSUC 640633	RMMA100629-15	Mycetomollerius	zeteki	gyne	NA	Smithsonian Tropical Research Institute Panama, Panama
OSUC 640634	RMMA100629-15	Mycetomollerius	zeteki	gyne	NA	Smithsonian Tropical Research Institute Panama, Panama
OSUC 640604	RMMA100629-15	Mycetomollerius	zeteki	gyne	NA	The Ohio State University Museum of Biological Diversity Triplehorn Insect Collection, United States of America
USNMENT01123713	RMMA100629-15	Mycetomollerius	zeteki	male	NA	National Museum of Natural History, United States of America
USNMENT01123720	RMMA100629-15	Mycetomollerius	zeteki	male	NA	National Museum of Natural History, United States of America
USNMENT01123721	RMMA100629-15	Mycetomollerius	zeteki	male	NA	National Museum of Natural History, United States of America
USNMENT01123722	RMMA100629-15	Mycetomollerius	zeteki	male	NA	National Museum of Natural History, United States of America
OSUC 640617	RMMA100629-15	Mycetomollerius	zeteki	male	NA	Museu de Zoologia da Universidade de São Paulo, Brazil
OSUC 640633	RMMA100629-15	Mycetomollerius	zeteki	male	NA	Smithsonian Tropical Research Institute Panama, Panama
OSUC 640634	RMMA100629-15	Mycetomollerius	zeteki	male	NA	Smithsonian Tropical Research Institute Panama, Panama
OSUC 640605	RMMA100629-15	Mycetomollerius	zeteki	male	NA	The Ohio State University Museum of Biological Diversity Triplehorn Insect Collection, United States of America
OSU 640201	KG110510-01	Mycetomollerius	zeteki	worker	NA	The Ohio State University Museum of Biological Diversity Triplehorn Insect Collection, United States of America
OSU 640202	KG110510-01	Mycetomollerius	zeteki	worker	NA	The Ohio State University Museum of Biological Diversity Triplehorn Insect Collection, United States of America
OSU 640203	KG110510-01	Mycetomollerius	zeteki	worker	NA	The Ohio State University Museum of Biological Diversity Triplehorn Insect Collection, United States of America
OSU 640204	KG110510-01	Mycetomollerius	zeteki	worker	NA	The Ohio State University Museum of Biological Diversity Triplehorn Insect Collection, United States of America
OSU 640205	KG110510-01	Mycetomollerius	zeteki	worker	NA	The Ohio State University Museum of Biological Diversity Triplehorn Insect Collection, United States of America
OSU 640206	KG111505-03	Mycetomollerius	zeteki	worker	NA	The Ohio State University Museum of Biological Diversity Triplehorn Insect Collection, United States of America
OSU 640207	KG111505-03	Mycetomollerius	zeteki	worker	NA	The Ohio State University Museum of Biological Diversity Triplehorn Insect Collection, United States of America
OSU 640208	KG111505-03	Mycetomollerius	zeteki	worker	NA	The Ohio State University Museum of Biological Diversity Triplehorn Insect Collection, United States of America
OSU 640209	KG111505-03	Mycetomollerius	zeteki	worker	NA	The Ohio State University Museum of Biological Diversity Triplehorn Insect Collection, United States of America
OSU 640210	KG111505-03	Mycetomollerius	zeteki	worker	NA	The Ohio State University Museum of Biological Diversity Triplehorn Insect Collection, United States of America
OSU 640211	KG110512-01	Mycetomollerius	zeteki	worker	NA	The Ohio State University Museum of Biological Diversity Triplehorn Insect Collection, United States of America
OSU 640212	KG110512-01	Mycetomollerius	zeteki	worker	NA	The Ohio State University Museum of Biological Diversity Triplehorn Insect Collection, United States of America
OSU 640213	KG110512-01	Mycetomollerius	zeteki	worker	NA	The Ohio State University Museum of Biological Diversity Triplehorn Insect Collection, United States of America
OSU 640214	KG110512-01	Mycetomollerius	zeteki	worker	NA	The Ohio State University Museum of Biological Diversity Triplehorn Insect Collection, United States of America
OSU 640215	RMMA100629-23	Mycetomollerius	zeteki	worker	NA	The Ohio State University Museum of Biological Diversity Triplehorn Insect Collection, United States of America
OSU 640216	RMMA100629-23	Mycetomollerius	zeteki	worker	NA	The Ohio State University Museum of Biological Diversity Triplehorn Insect Collection, United States of America
OSU 640217	RMMA100629-23	Mycetomollerius	zeteki	worker	NA	The Ohio State University Museum of Biological Diversity Triplehorn Insect Collection, United States of America
OSU 640218	RMMA100629-23	Mycetomollerius	zeteki	worker	NA	The Ohio State University Museum of Biological Diversity Triplehorn Insect Collection, United States of America
OSU 640224	RMMA1000624-28	Mycetomollerius	zeteki	worker	NA	The Ohio State University Museum of Biological Diversity Triplehorn Insect Collection, United States of America
OSU 640225	RMMA1000624-28	Mycetomollerius	zeteki	worker	NA	The Ohio State University Museum of Biological Diversity Triplehorn Insect Collection, United States of America
OSU 640226	KG110515-03	Mycetomollerius	zeteki	worker	NA	The Ohio State University Museum of Biological Diversity Triplehorn Insect Collection, United States of America
OSU 640227	KG110515-03	Mycetomollerius	zeteki	worker	NA	The Ohio State University Museum of Biological Diversity Triplehorn Insect Collection, United States of America
OSU 640228	KG110515-03	Mycetomollerius	zeteki	worker	NA	The Ohio State University Museum of Biological Diversity Triplehorn Insect Collection, United States of America
OSU 640229	KG110515-03	Mycetomollerius	zeteki	worker	NA	The Ohio State University Museum of Biological Diversity Triplehorn Insect Collection, United States of America
OSU 640230	KG110515-03	Mycetomollerius	zeteki	worker	NA	The Ohio State University Museum of Biological Diversity Triplehorn Insect Collection, United States of America
OSU 640231	KG110515-03	Mycetomollerius	zeteki	worker	NA	The Ohio State University Museum of Biological Diversity Triplehorn Insect Collection, United States of America
USNMENT00752572	HDFL19052010-8	Mycetomollerius	zeteki	worker	NA	The Ohio State University Museum of Biological Diversity Triplehorn Insect Collection, United States of America
USNMENT00752570	HDFL19052010-8	Mycetomollerius	zeteki	worker	NA	The Ohio State University Museum of Biological Diversity Triplehorn Insect Collection, United States of America
OSU 640375	KG110512-01A	Mycetomollerius	zeteki	worker	NA	The Ohio State University Museum of Biological Diversity Triplehorn Insect Collection, United States of America
OSU 640376	KG110512-01A	Mycetomollerius	zeteki	worker	NA	The Ohio State University Museum of Biological Diversity Triplehorn Insect Collection, United States of America
OSU 640377	KG110512-01A	Mycetomollerius	zeteki	worker	NA	The Ohio State University Museum of Biological Diversity Triplehorn Insect Collection, United States of America
OSU 640379	KG110515-05	Mycetomollerius	zeteki	worker	NA	The Ohio State University Museum of Biological Diversity Triplehorn Insect Collection, United States of America
OSU 640380	KG110515-05	Mycetomollerius	zeteki	worker	NA	The Ohio State University Museum of Biological Diversity Triplehorn Insect Collection, United States of America
OSU 640381	KG110515-05	Mycetomollerius	zeteki	worker	NA	The Ohio State University Museum of Biological Diversity Triplehorn Insect Collection, United States of America
OSU 640391	KG110515-01	Mycetomollerius	zeteki	worker	NA	The Ohio State University Museum of Biological Diversity Triplehorn Insect Collection, United States of America
OSU 640392	KG110515-01	Mycetomollerius	zeteki	worker	NA	The Ohio State University Museum of Biological Diversity Triplehorn Insect Collection, United States of America
OSU 640393	KG110515-01	Mycetomollerius	zeteki	worker	NA	The Ohio State University Museum of Biological Diversity Triplehorn Insect Collection, United States of America
OSU 640394	KG110515-01	Mycetomollerius	zeteki	worker	NA	The Ohio State University Museum of Biological Diversity Triplehorn Insect Collection, United States of America
OSU 640395	KG110515-01	Mycetomollerius	zeteki	worker	NA	The Ohio State University Museum of Biological Diversity Triplehorn Insect Collection, United States of America
OSU 640501	RMMA050816-04	Mycetomollerius	zeteki	worker	NA	The Ohio State University Museum of Biological Diversity Triplehorn Insect Collection, United States of America
OSU 640502	RMMA050816-04	Mycetomollerius	zeteki	worker	NA	The Ohio State University Museum of Biological Diversity Triplehorn Insect Collection, United States of America
OSU 640503	RMMA050816-04	Mycetomollerius	zeteki	worker	NA	The Ohio State University Museum of Biological Diversity Triplehorn Insect Collection, United States of America
OSU 640507	RMMA050818-05	Mycetomollerius	zeteki	worker	NA	The Ohio State University Museum of Biological Diversity Triplehorn Insect Collection, United States of America
OSU 640508	RMMA050818-05	Mycetomollerius	zeteki	worker	NA	The Ohio State University Museum of Biological Diversity Triplehorn Insect Collection, United States of America
OSU 640238	KG110515-02B	Mycetomollerius	mikromelanos	worker	NA	The Ohio State University Museum of Biological Diversity Triplehorn Insect Collection, United States of America
OSU 640239	KG110515-02B	Mycetomollerius	mikromelanos	worker	NA	The Ohio State University Museum of Biological Diversity Triplehorn Insect Collection, United States of America
OSU 640240	KG110515-02B	Mycetomollerius	mikromelanos	worker	NA	The Ohio State University Museum of Biological Diversity Triplehorn Insect Collection, United States of America
OSU 640241	KG110515-08	Mycetomollerius	mikromelanos	worker	NA	The Ohio State University Museum of Biological Diversity Triplehorn Insect Collection, United States of America
OSU 640243	KG110515-08	Mycetomollerius	mikromelanos	worker	NA	The Ohio State University Museum of Biological Diversity Triplehorn Insect Collection, United States of America
OSU 640245	KG110515-08	Mycetomollerius	mikromelanos	worker	NA	The Ohio State University Museum of Biological Diversity Triplehorn Insect Collection, United States of America
OSU 640246	KG110515-09	Mycetomollerius	mikromelanos	worker	NA	The Ohio State University Museum of Biological Diversity Triplehorn Insect Collection, United States of America
OSU 640250	KG110515-09	Mycetomollerius	mikromelanos	worker	NA	The Ohio State University Museum of Biological Diversity Triplehorn Insect Collection, United States of America
OSU 640248	KG110515-09	Mycetomollerius	mikromelanos	worker	NA	The Ohio State University Museum of Biological Diversity Triplehorn Insect Collection, United States of America
OSU 640249	KG110515-09	Mycetomollerius	mikromelanos	worker	NA	The Ohio State University Museum of Biological Diversity Triplehorn Insect Collection, United States of America
OSU 640251	KG110515-09	Mycetomollerius	mikromelanos	worker	NA	The Ohio State University Museum of Biological Diversity Triplehorn Insect Collection, United States of America
OSU 640252	KG110507-02	Mycetomollerius	mikromelanos	worker	NA	The Ohio State University Museum of Biological Diversity Triplehorn Insect Collection, United States of America
OSU 640253	KG110507-02	Mycetomollerius	mikromelanos	worker	NA	The Ohio State University Museum of Biological Diversity Triplehorn Insect Collection, United States of America
OSU 640254	KG110507-02	Mycetomollerius	mikromelanos	worker	NA	The Ohio State University Museum of Biological Diversity Triplehorn Insect Collection, United States of America
OSU 640255	KG110507-02	Mycetomollerius	mikromelanos	worker	NA	The Ohio State University Museum of Biological Diversity Triplehorn Insect Collection, United States of America
OSU 640256	KG110507-02	Mycetomollerius	mikromelanos	worker	NA	The Ohio State University Museum of Biological Diversity Triplehorn Insect Collection, United States of America
OSU 640257	KG110507-02	Mycetomollerius	mikromelanos	worker	NA	The Ohio State University Museum of Biological Diversity Triplehorn Insect Collection, United States of America
OSU 640258	KG110507-02	Mycetomollerius	mikromelanos	worker	NA	The Ohio State University Museum of Biological Diversity Triplehorn Insect Collection, United States of America
OSU 640260	KG110520-03	Mycetomollerius	mikromelanos	worker	NA	The Ohio State University Museum of Biological Diversity Triplehorn Insect Collection, United States of America
OSU 640259	KG110520-03	Mycetomollerius	mikromelanos	worker	NA	The Ohio State University Museum of Biological Diversity Triplehorn Insect Collection, United States of America
OSU 640261	KG110520-03	Mycetomollerius	mikromelanos	worker	NA	The Ohio State University Museum of Biological Diversity Triplehorn Insect Collection, United States of America
OSU 640262	KG110520-03	Mycetomollerius	mikromelanos	worker	NA	The Ohio State University Museum of Biological Diversity Triplehorn Insect Collection, United States of America
OSU 640263	KG110520-03	Mycetomollerius	mikromelanos	worker	NA	The Ohio State University Museum of Biological Diversity Triplehorn Insect Collection, United States of America
OSU 640264	KG110520-09	Mycetomollerius	mikromelanos	worker	NA	The Ohio State University Museum of Biological Diversity Triplehorn Insect Collection, United States of America
OSU 640267	KG110520-09	Mycetomollerius	mikromelanos	worker	NA	The Ohio State University Museum of Biological Diversity Triplehorn Insect Collection, United States of America
OSU 640268	KG110520-09	Mycetomollerius	mikromelanos	worker	NA	The Ohio State University Museum of Biological Diversity Triplehorn Insect Collection, United States of America
OSU 640269	KG110520-09	Mycetomollerius	mikromelanos	worker	NA	The Ohio State University Museum of Biological Diversity Triplehorn Insect Collection, United States of America
OSU 640270	KG110520-11	Mycetomollerius	mikromelanos	worker	NA	The Ohio State University Museum of Biological Diversity Triplehorn Insect Collection, United States of America
OSU 640271	KG110520-11	Mycetomollerius	mikromelanos	worker	NA	The Ohio State University Museum of Biological Diversity Triplehorn Insect Collection, United States of America
OSU 640272	KG110520-11	Mycetomollerius	mikromelanos	worker	NA	The Ohio State University Museum of Biological Diversity Triplehorn Insect Collection, United States of America
OSU 640273	KG110520-11	Mycetomollerius	mikromelanos	worker	NA	The Ohio State University Museum of Biological Diversity Triplehorn Insect Collection, United States of America
OSU 640274	KG110520-11	Mycetomollerius	mikromelanos	worker	NA	The Ohio State University Museum of Biological Diversity Triplehorn Insect Collection, United States of America
OSU 640275	KG110520-11	Mycetomollerius	mikromelanos	worker	NA	The Ohio State University Museum of Biological Diversity Triplehorn Insect Collection, United States of America
OSU 640276	KG110520-11	Mycetomollerius	mikromelanos	worker	NA	The Ohio State University Museum of Biological Diversity Triplehorn Insect Collection, United States of America
OSU 640277	KG110520-11	Mycetomollerius	mikromelanos	worker	NA	The Ohio State University Museum of Biological Diversity Triplehorn Insect Collection, United States of America
OSU 640278	KG110520-11	Mycetomollerius	mikromelanos	worker	NA	The Ohio State University Museum of Biological Diversity Triplehorn Insect Collection, United States of America
OSU 640279	KG110505-02	Mycetomollerius	mikromelanos	worker	NA	The Ohio State University Museum of Biological Diversity Triplehorn Insect Collection, United States of America
OSU 640280	KG110505-02	Mycetomollerius	mikromelanos	worker	NA	The Ohio State University Museum of Biological Diversity Triplehorn Insect Collection, United States of America
OSU 640281	KG110505-02	Mycetomollerius	mikromelanos	worker	NA	The Ohio State University Museum of Biological Diversity Triplehorn Insect Collection, United States of America
OSU 640283	KG110505-02	Mycetomollerius	mikromelanos	worker	NA	The Ohio State University Museum of Biological Diversity Triplehorn Insect Collection, United States of America
OSU 640284	KG110513-01	Mycetomollerius	mikromelanos	worker	NA	The Ohio State University Museum of Biological Diversity Triplehorn Insect Collection, United States of America
OSU 640285	KG110513-01	Mycetomollerius	mikromelanos	worker	NA	The Ohio State University Museum of Biological Diversity Triplehorn Insect Collection, United States of America
OSU 640286	KG110513-01	Mycetomollerius	mikromelanos	worker	NA	The Ohio State University Museum of Biological Diversity Triplehorn Insect Collection, United States of America
OSU 640287	KG110513-01	Mycetomollerius	mikromelanos	worker	NA	The Ohio State University Museum of Biological Diversity Triplehorn Insect Collection, United States of America
OSU 640288	KG110513-01	Mycetomollerius	mikromelanos	worker	NA	The Ohio State University Museum of Biological Diversity Triplehorn Insect Collection, United States of America
OSU 640289	KG110513-05	Mycetomollerius	mikromelanos	worker	NA	The Ohio State University Museum of Biological Diversity Triplehorn Insect Collection, United States of America
OSU 640290	KG110513-05	Mycetomollerius	mikromelanos	worker	NA	The Ohio State University Museum of Biological Diversity Triplehorn Insect Collection, United States of America
OSU 640291	KG110513-05	Mycetomollerius	mikromelanos	worker	NA	The Ohio State University Museum of Biological Diversity Triplehorn Insect Collection, United States of America
OSU 640292	KG110513-05	Mycetomollerius	mikromelanos	worker	NA	The Ohio State University Museum of Biological Diversity Triplehorn Insect Collection, United States of America
OSU 640293	KG110513-05	Mycetomollerius	mikromelanos	worker	NA	The Ohio State University Museum of Biological Diversity Triplehorn Insect Collection, United States of America
OSU 640294	KG110513-03	Mycetomollerius	mikromelanos	worker	NA	The Ohio State University Museum of Biological Diversity Triplehorn Insect Collection, United States of America
OSU 640295	KG110513-03	Mycetomollerius	mikromelanos	worker	NA	The Ohio State University Museum of Biological Diversity Triplehorn Insect Collection, United States of America
OSU 640296	KG110513-03	Mycetomollerius	mikromelanos	worker	NA	The Ohio State University Museum of Biological Diversity Triplehorn Insect Collection, United States of America
OSU 640297	KG110513-03	Mycetomollerius	mikromelanos	worker	NA	The Ohio State University Museum of Biological Diversity Triplehorn Insect Collection, United States of America
OSU 640298	KG110513-03	Mycetomollerius	mikromelanos	worker	NA	The Ohio State University Museum of Biological Diversity Triplehorn Insect Collection, United States of America
OSU 640299	KG110513-04	Mycetomollerius	mikromelanos	worker	NA	The Ohio State University Museum of Biological Diversity Triplehorn Insect Collection, United States of America
OSU 640300	KG110513-04	Mycetomollerius	mikromelanos	worker	NA	The Ohio State University Museum of Biological Diversity Triplehorn Insect Collection, United States of America
OSU 640301	KG110513-04	Mycetomollerius	mikromelanos	worker	NA	The Ohio State University Museum of Biological Diversity Triplehorn Insect Collection, United States of America
OSU 640302	KG110513-04	Mycetomollerius	mikromelanos	worker	NA	The Ohio State University Museum of Biological Diversity Triplehorn Insect Collection, United States of America
OSU 640303	KG110513-04	Mycetomollerius	mikromelanos	worker	NA	The Ohio State University Museum of Biological Diversity Triplehorn Insect Collection, United States of America
OSU 640304	KG110505-04	Mycetomollerius	mikromelanos	worker	NA	The Ohio State University Museum of Biological Diversity Triplehorn Insect Collection, United States of America
OSU 640305	KG110505-04	Mycetomollerius	mikromelanos	worker	NA	The Ohio State University Museum of Biological Diversity Triplehorn Insect Collection, United States of America
OSU 640306	KG110502-12	Mycetomollerius	mikromelanos	worker	NA	The Ohio State University Museum of Biological Diversity Triplehorn Insect Collection, United States of America
OSU 640307	KG110502-12	Mycetomollerius	mikromelanos	worker	NA	The Ohio State University Museum of Biological Diversity Triplehorn Insect Collection, United States of America
OSU 640308	KG110502-12	Mycetomollerius	mikromelanos	worker	NA	The Ohio State University Museum of Biological Diversity Triplehorn Insect Collection, United States of America
OSU 640309	KG110513-20	Mycetomollerius	mikromelanos	worker	NA	The Ohio State University Museum of Biological Diversity Triplehorn Insect Collection, United States of America
OSU 640310	KG110513-20	Mycetomollerius	mikromelanos	worker	NA	The Ohio State University Museum of Biological Diversity Triplehorn Insect Collection, United States of America
OSU 640311	KG110513-20	Mycetomollerius	mikromelanos	worker	NA	The Ohio State University Museum of Biological Diversity Triplehorn Insect Collection, United States of America
OSU 640312	KG110513-20	Mycetomollerius	mikromelanos	worker	NA	The Ohio State University Museum of Biological Diversity Triplehorn Insect Collection, United States of America
OSU 640313	KG110513-20	Mycetomollerius	mikromelanos	worker	NA	The Ohio State University Museum of Biological Diversity Triplehorn Insect Collection, United States of America
USNMENT00752575	HDFL28052010-04 ch1	Mycetomollerius	mikromelanos	worker	NA	The Ohio State University Museum of Biological Diversity Triplehorn Insect Collection, United States of America
USNMENT00752577	HDFL28052010-04 ch1	Mycetomollerius	mikromelanos	worker	NA	The Ohio State University Museum of Biological Diversity Triplehorn Insect Collection, United States of America
USNMENT00752566	HDFL28052010-04 ch1	Mycetomollerius	mikromelanos	worker	NA	The Ohio State University Museum of Biological Diversity Triplehorn Insect Collection, United States of America
USNMENT00752581	HDFL28052010-05	Mycetomollerius	mikromelanos	worker	NA	The Ohio State University Museum of Biological Diversity Triplehorn Insect Collection, United States of America
USNMENT00752582	HDFL28052010-05	Mycetomollerius	mikromelanos	worker	NA	The Ohio State University Museum of Biological Diversity Triplehorn Insect Collection, United States of America
USNMENT00752580	HDFL28052010-05	Mycetomollerius	mikromelanos	worker	NA	The Ohio State University Museum of Biological Diversity Triplehorn Insect Collection, United States of America
USNMENT00752574	HDFL28052010-05	Mycetomollerius	mikromelanos	worker	NA	The Ohio State University Museum of Biological Diversity Triplehorn Insect Collection, United States of America
USNMENT00752578	HDFL12052010-14	Mycetomollerius	mikromelanos	worker	NA	The Ohio State University Museum of Biological Diversity Triplehorn Insect Collection, United States of America
USNMENT00752579	HDFL12052010-14	Mycetomollerius	mikromelanos	worker	NA	The Ohio State University Museum of Biological Diversity Triplehorn Insect Collection, United States of America
USNMENT00752565	HDFL12052010-14	Mycetomollerius	mikromelanos	worker	NA	The Ohio State University Museum of Biological Diversity Triplehorn Insect Collection, United States of America
OSU 640406	KG110506-06	Mycetomollerius	mikromelanos	worker	NA	The Ohio State University Museum of Biological Diversity Triplehorn Insect Collection, United States of America
OSU 640407	KG110506-06	Mycetomollerius	mikromelanos	worker	NA	The Ohio State University Museum of Biological Diversity Triplehorn Insect Collection, United States of America
OSU 640408	KG110506-06	Mycetomollerius	mikromelanos	worker	NA	The Ohio State University Museum of Biological Diversity Triplehorn Insect Collection, United States of America
OSU 640409	KG110506-06	Mycetomollerius	mikromelanos	worker	NA	The Ohio State University Museum of Biological Diversity Triplehorn Insect Collection, United States of America
OSU 640410	KG110506-06	Mycetomollerius	mikromelanos	worker	NA	The Ohio State University Museum of Biological Diversity Triplehorn Insect Collection, United States of America
OSU 640411	KG110515-01B	Mycetomollerius	mikromelanos	worker	NA	The Ohio State University Museum of Biological Diversity Triplehorn Insect Collection, United States of America
OSU 640412	KG110515-01B	Mycetomollerius	mikromelanos	worker	NA	The Ohio State University Museum of Biological Diversity Triplehorn Insect Collection, United States of America
OSU 640413	KG110515-01B	Mycetomollerius	mikromelanos	worker	NA	The Ohio State University Museum of Biological Diversity Triplehorn Insect Collection, United States of America
OSU 640414	KG110511-02	Mycetomollerius	mikromelanos	worker	NA	The Ohio State University Museum of Biological Diversity Triplehorn Insect Collection, United States of America
OSU 640415	KG110511-02	Mycetomollerius	mikromelanos	worker	NA	The Ohio State University Museum of Biological Diversity Triplehorn Insect Collection, United States of America
OSU 640416	KG110511-02	Mycetomollerius	mikromelanos	worker	NA	The Ohio State University Museum of Biological Diversity Triplehorn Insect Collection, United States of America
OSU 640417	KG110511-02	Mycetomollerius	mikromelanos	worker	NA	The Ohio State University Museum of Biological Diversity Triplehorn Insect Collection, United States of America
OSU 640418	RMMA100519-01	Mycetomollerius	mikromelanos	worker	NA	The Ohio State University Museum of Biological Diversity Triplehorn Insect Collection, United States of America
OSU 640419	RMMA100519-01	Mycetomollerius	mikromelanos	worker	NA	The Ohio State University Museum of Biological Diversity Triplehorn Insect Collection, United States of America
OSU 640420	RMMA100519-01	Mycetomollerius	mikromelanos	worker	NA	The Ohio State University Museum of Biological Diversity Triplehorn Insect Collection, United States of America
OSU 640421	RMMA100519-01	Mycetomollerius	mikromelanos	worker	NA	The Ohio State University Museum of Biological Diversity Triplehorn Insect Collection, United States of America
OSU 640422	RMMA100519-01	Mycetomollerius	mikromelanos	worker	NA	The Ohio State University Museum of Biological Diversity Triplehorn Insect Collection, United States of America
OSU 640423	RMMA100519-04	Mycetomollerius	mikromelanos	worker	NA	The Ohio State University Museum of Biological Diversity Triplehorn Insect Collection, United States of America
OSU 640424	RMMA100519-04	Mycetomollerius	mikromelanos	worker	NA	The Ohio State University Museum of Biological Diversity Triplehorn Insect Collection, United States of America
OSU 640425	RMMA100519-04	Mycetomollerius	mikromelanos	worker	NA	The Ohio State University Museum of Biological Diversity Triplehorn Insect Collection, United States of America
OSU 640426	RMMA100519-04	Mycetomollerius	mikromelanos	worker	NA	The Ohio State University Museum of Biological Diversity Triplehorn Insect Collection, United States of America
OSU 640427	RMMA100519-04	Mycetomollerius	mikromelanos	worker	NA	The Ohio State University Museum of Biological Diversity Triplehorn Insect Collection, United States of America
OSU 640428	RMMA100511-02	Mycetomollerius	mikromelanos	worker	NA	The Ohio State University Museum of Biological Diversity Triplehorn Insect Collection, United States of America
OSU 640429	RMMA100511-02	Mycetomollerius	mikromelanos	worker	NA	The Ohio State University Museum of Biological Diversity Triplehorn Insect Collection, United States of America
OSU 640430	RMMA100511-02	Mycetomollerius	mikromelanos	worker	NA	The Ohio State University Museum of Biological Diversity Triplehorn Insect Collection, United States of America
CASENT0633645	JTL6	Mycetomollerius	mikromelanos	worker	NA	The Ohio State University Museum of Biological Diversity Triplehorn Insect Collection, United States of America
OSU 640504	RMMA050727-06	Mycetomollerius	mikromelanos	worker	NA	The Ohio State University Museum of Biological Diversity Triplehorn Insect Collection, United States of America
OSU 640505	RMMA050727-06	Mycetomollerius	mikromelanos	worker	NA	The Ohio State University Museum of Biological Diversity Triplehorn Insect Collection, United States of America
OSU 640506	RMMA050727-06	Mycetomollerius	mikromelanos	worker	NA	The Ohio State University Museum of Biological Diversity Triplehorn Insect Collection, United States of America
OSU 640533	RMMA990929-06	Mycetomollerius	mikromelanos	worker	NA	The Ohio State University Museum of Biological Diversity Triplehorn Insect Collection, United States of America
OSU 640534	RMMA990929-06	Mycetomollerius	mikromelanos	worker	NA	The Ohio State University Museum of Biological Diversity Triplehorn Insect Collection, United States of America
OSU 640535	RMMA990929-06	Mycetomollerius	mikromelanos	worker	NA	The Ohio State University Museum of Biological Diversity Triplehorn Insect Collection, United States of America
OSU 640536	RMMA990929-06	Mycetomollerius	mikromelanos	worker	NA	The Ohio State University Museum of Biological Diversity Triplehorn Insect Collection, United States of America
OSU 640319	KG110512-01	Mycetomollerius	zeteki	male	NA	The Ohio State University Museum of Biological Diversity Triplehorn Insect Collection, United States of America
OSU 640320	KG110512-01	Mycetomollerius	zeteki	male	NA	The Ohio State University Museum of Biological Diversity Triplehorn Insect Collection, United States of America
OSU 640321	KG110512-01	Mycetomollerius	zeteki	male	NA	The Ohio State University Museum of Biological Diversity Triplehorn Insect Collection, United States of America
OSU 640322	KG110512-01	Mycetomollerius	zeteki	male	NA	The Ohio State University Museum of Biological Diversity Triplehorn Insect Collection, United States of America
OSU 640323	KG110512-01	Mycetomollerius	zeteki	male	NA	The Ohio State University Museum of Biological Diversity Triplehorn Insect Collection, United States of America
OSU 640324	KG110510-01	Mycetomollerius	zeteki	male	NA	The Ohio State University Museum of Biological Diversity Triplehorn Insect Collection, United States of America
OSU 640325	KG110510-01	Mycetomollerius	zeteki	male	NA	The Ohio State University Museum of Biological Diversity Triplehorn Insect Collection, United States of America
OSU 640326	KG110510-01	Mycetomollerius	zeteki	male	NA	The Ohio State University Museum of Biological Diversity Triplehorn Insect Collection, United States of America
OSU 640327	KG110510-01	Mycetomollerius	zeteki	male	NA	The Ohio State University Museum of Biological Diversity Triplehorn Insect Collection, United States of America
USNMENT00752570	HDFL19052010-8	Mycetomollerius	zeteki	male	NA	The Ohio State University Museum of Biological Diversity Triplehorn Insect Collection, United States of America
USNMENT00752568	HDFL19052010-8	Mycetomollerius	zeteki	male	NA	The Ohio State University Museum of Biological Diversity Triplehorn Insect Collection, United States of America
OSU 640367	KG110512-01A	Mycetomollerius	zeteki	male	NA	The Ohio State University Museum of Biological Diversity Triplehorn Insect Collection, United States of America
OSU 640368	KG110512-01A	Mycetomollerius	zeteki	male	NA	The Ohio State University Museum of Biological Diversity Triplehorn Insect Collection, United States of America
OSU 640369	KG110512-01A	Mycetomollerius	zeteki	male	NA	The Ohio State University Museum of Biological Diversity Triplehorn Insect Collection, United States of America
OSU 640370	KG110512-01A	Mycetomollerius	zeteki	male	NA	The Ohio State University Museum of Biological Diversity Triplehorn Insect Collection, United States of America
OSU 640387	KG110515-01	Mycetomollerius	zeteki	male	NA	The Ohio State University Museum of Biological Diversity Triplehorn Insect Collection, United States of America
OSU 640388	KG110515-01	Mycetomollerius	zeteki	male	NA	The Ohio State University Museum of Biological Diversity Triplehorn Insect Collection, United States of America
OSU 640389	KG110515-01	Mycetomollerius	zeteki	male	NA	The Ohio State University Museum of Biological Diversity Triplehorn Insect Collection, United States of America
OSU 640390	KG110515-01	Mycetomollerius	zeteki	male	NA	The Ohio State University Museum of Biological Diversity Triplehorn Insect Collection, United States of America
OSU 640333	KG110515-09	Mycetomollerius	mikromelanos	male	NA	The Ohio State University Museum of Biological Diversity Triplehorn Insect Collection, United States of America
OSU 640334	KG110515-09	Mycetomollerius	mikromelanos	male	NA	The Ohio State University Museum of Biological Diversity Triplehorn Insect Collection, United States of America
OSU 640335	KG110515-09	Mycetomollerius	mikromelanos	male	NA	The Ohio State University Museum of Biological Diversity Triplehorn Insect Collection, United States of America
OSU 640336	KG110515-09	Mycetomollerius	mikromelanos	male	NA	The Ohio State University Museum of Biological Diversity Triplehorn Insect Collection, United States of America
OSU 640337	KG110515-09	Mycetomollerius	mikromelanos	male	NA	The Ohio State University Museum of Biological Diversity Triplehorn Insect Collection, United States of America
OSU 640338	KG110520-12	Mycetomollerius	mikromelanos	male	NA	The Ohio State University Museum of Biological Diversity Triplehorn Insect Collection, United States of America
OSU 640339	KG110520-12	Mycetomollerius	mikromelanos	male	NA	The Ohio State University Museum of Biological Diversity Triplehorn Insect Collection, United States of America
OSU 640340	KG110520-12	Mycetomollerius	mikromelanos	male	NA	The Ohio State University Museum of Biological Diversity Triplehorn Insect Collection, United States of America
OSU 640341	KG110520-12	Mycetomollerius	mikromelanos	male	NA	The Ohio State University Museum of Biological Diversity Triplehorn Insect Collection, United States of America
OSU 640354	KG110505-02	Mycetomollerius	mikromelanos	male	NA	The Ohio State University Museum of Biological Diversity Triplehorn Insect Collection, United States of America
OSU 640355	KG110505-02	Mycetomollerius	mikromelanos	male	NA	The Ohio State University Museum of Biological Diversity Triplehorn Insect Collection, United States of America
OSU 640356	KG110505-02	Mycetomollerius	mikromelanos	male	NA	The Ohio State University Museum of Biological Diversity Triplehorn Insect Collection, United States of America
OSU 640357	KG110505-02	Mycetomollerius	mikromelanos	male	NA	The Ohio State University Museum of Biological Diversity Triplehorn Insect Collection, United States of America
OSU 640358	KG110505-02	Mycetomollerius	mikromelanos	male	NA	The Ohio State University Museum of Biological Diversity Triplehorn Insect Collection, United States of America
USNMENT00752578	HDFL12052010-14	Mycetomollerius	mikromelanos	male	NA	The Ohio State University Museum of Biological Diversity Triplehorn Insect Collection, United States of America
USNMENT00752576	HDFL12052010-14	Mycetomollerius	mikromelanos	male	NA	The Ohio State University Museum of Biological Diversity Triplehorn Insect Collection, United States of America
OSU 640360	KG110520-03	Mycetomollerius	mikromelanos	male	NA	The Ohio State University Museum of Biological Diversity Triplehorn Insect Collection, United States of America
OSU 640361	KG110520-03	Mycetomollerius	mikromelanos	male	NA	The Ohio State University Museum of Biological Diversity Triplehorn Insect Collection, United States of America
OSU 640314	KG110512-01	Mycetomollerius	zeteki	gyne	NA	The Ohio State University Museum of Biological Diversity Triplehorn Insect Collection, United States of America
OSU 640315	KG110512-01	Mycetomollerius	zeteki	gyne	NA	The Ohio State University Museum of Biological Diversity Triplehorn Insect Collection, United States of America
OSU 640316	KG110512-01	Mycetomollerius	zeteki	gyne	NA	The Ohio State University Museum of Biological Diversity Triplehorn Insect Collection, United States of America
OSU 640317	KG110512-01	Mycetomollerius	zeteki	gyne	NA	The Ohio State University Museum of Biological Diversity Triplehorn Insect Collection, United States of America
OSU 640318	KG110512-01	Mycetomollerius	zeteki	gyne	NA	The Ohio State University Museum of Biological Diversity Triplehorn Insect Collection, United States of America
OSU 640328	KG110515-03	Mycetomollerius	zeteki	gyne	NA	The Ohio State University Museum of Biological Diversity Triplehorn Insect Collection, United States of America
OSU 640329	KG110515-03	Mycetomollerius	zeteki	gyne	NA	The Ohio State University Museum of Biological Diversity Triplehorn Insect Collection, United States of America
OSU 640330	KG110515-03	Mycetomollerius	zeteki	gyne	NA	The Ohio State University Museum of Biological Diversity Triplehorn Insect Collection, United States of America
OSU 640331	KG110515-03	Mycetomollerius	zeteki	gyne	NA	The Ohio State University Museum of Biological Diversity Triplehorn Insect Collection, United States of America
OSU 640332	KG110515-03	Mycetomollerius	zeteki	gyne	NA	The Ohio State University Museum of Biological Diversity Triplehorn Insect Collection, United States of America
OSU 640363	KG110510-01	Mycetomollerius	zeteki	gyne	NA	The Ohio State University Museum of Biological Diversity Triplehorn Insect Collection, United States of America
OSU 640364	RMMA110515-01	Mycetomollerius	zeteki	gyne	NA	The Ohio State University Museum of Biological Diversity Triplehorn Insect Collection, United States of America
OSU 640365	KG110520-14	Mycetomollerius	zeteki	gyne	NA	The Ohio State University Museum of Biological Diversity Triplehorn Insect Collection, United States of America
OSU 640366	KG110515-01A	Mycetomollerius	zeteki	gyne	NA	The Ohio State University Museum of Biological Diversity Triplehorn Insect Collection, United States of America
OSU 640371	KG110512-01A	Mycetomollerius	zeteki	gyne	NA	The Ohio State University Museum of Biological Diversity Triplehorn Insect Collection, United States of America
OSU 640372	KG110512-01A	Mycetomollerius	zeteki	gyne	NA	The Ohio State University Museum of Biological Diversity Triplehorn Insect Collection, United States of America
OSU 640373	KG110512-01A	Mycetomollerius	zeteki	gyne	NA	The Ohio State University Museum of Biological Diversity Triplehorn Insect Collection, United States of America
OSU 640374	KG110512-01A	Mycetomollerius	zeteki	gyne	NA	The Ohio State University Museum of Biological Diversity Triplehorn Insect Collection, United States of America
OSU 640382	KG110515-01	Mycetomollerius	zeteki	gyne	NA	The Ohio State University Museum of Biological Diversity Triplehorn Insect Collection, United States of America
OSU 640383	KG110515-01	Mycetomollerius	zeteki	gyne	NA	The Ohio State University Museum of Biological Diversity Triplehorn Insect Collection, United States of America
OSU 640384	KG110515-01	Mycetomollerius	zeteki	gyne	NA	The Ohio State University Museum of Biological Diversity Triplehorn Insect Collection, United States of America
OSU 640385	KG110515-01	Mycetomollerius	zeteki	gyne	NA	The Ohio State University Museum of Biological Diversity Triplehorn Insect Collection, United States of America
OSU 640386	KG110515-01	Mycetomollerius	zeteki	gyne	NA	The Ohio State University Museum of Biological Diversity Triplehorn Insect Collection, United States of America
INB0003662402	JTL7	Mycetomollerius	zeteki	gyne	NA	The Ohio State University Museum of Biological Diversity Triplehorn Insect Collection, United States of America
OSU 640342	KG110515-09	Mycetomollerius	mikromelanos	gyne	NA	The Ohio State University Museum of Biological Diversity Triplehorn Insect Collection, United States of America
OSU 640343	KG110515-09	Mycetomollerius	mikromelanos	gyne	NA	The Ohio State University Museum of Biological Diversity Triplehorn Insect Collection, United States of America
OSU 640344	KG110515-09	Mycetomollerius	mikromelanos	gyne	NA	The Ohio State University Museum of Biological Diversity Triplehorn Insect Collection, United States of America
OSU 640345	KG110520-12	Mycetomollerius	mikromelanos	gyne	NA	The Ohio State University Museum of Biological Diversity Triplehorn Insect Collection, United States of America
OSU 640346	KG110520-12	Mycetomollerius	mikromelanos	gyne	NA	The Ohio State University Museum of Biological Diversity Triplehorn Insect Collection, United States of America
OSU 640347	KG110520-12	Mycetomollerius	mikromelanos	gyne	NA	The Ohio State University Museum of Biological Diversity Triplehorn Insect Collection, United States of America
OSU 640348	KG110515-06	Mycetomollerius	mikromelanos	gyne	NA	The Ohio State University Museum of Biological Diversity Triplehorn Insect Collection, United States of America
OSU 640349	KG110515-08	Mycetomollerius	mikromelanos	gyne	NA	The Ohio State University Museum of Biological Diversity Triplehorn Insect Collection, United States of America
OSU 640350	KG110515-08	Mycetomollerius	mikromelanos	gyne	NA	The Ohio State University Museum of Biological Diversity Triplehorn Insect Collection, United States of America
OSU 640351	KG110515-08	Mycetomollerius	mikromelanos	gyne	NA	The Ohio State University Museum of Biological Diversity Triplehorn Insect Collection, United States of America
OSU 640352	KG110515-08	Mycetomollerius	mikromelanos	gyne	NA	The Ohio State University Museum of Biological Diversity Triplehorn Insect Collection, United States of America
OSU 640353	KG110515-08	Mycetomollerius	mikromelanos	gyne	NA	The Ohio State University Museum of Biological Diversity Triplehorn Insect Collection, United States of America
OSU 640359	KG110520-03	Mycetomollerius	mikromelanos	gyne	NA	The Ohio State University Museum of Biological Diversity Triplehorn Insect Collection, United States of America
OSU 640396	KG110507-04	Mycetomollerius	mikromelanos	gyne	NA	The Ohio State University Museum of Biological Diversity Triplehorn Insect Collection, United States of America
OSU 640397	KG110520-09	Mycetomollerius	mikromelanos	gyne	NA	The Ohio State University Museum of Biological Diversity Triplehorn Insect Collection, United States of America
OSU 640399	KG110520-06	Mycetomollerius	mikromelanos	gyne	NA	The Ohio State University Museum of Biological Diversity Triplehorn Insect Collection, United States of America
OSU 640400	KG110515-02B	Mycetomollerius	mikromelanos	gyne	NA	The Ohio State University Museum of Biological Diversity Triplehorn Insect Collection, United States of America
OSU 640401	KG110515-02B	Mycetomollerius	mikromelanos	gyne	NA	The Ohio State University Museum of Biological Diversity Triplehorn Insect Collection, United States of America
OSU 640402	KG110515-02B	Mycetomollerius	mikromelanos	gyne	NA	The Ohio State University Museum of Biological Diversity Triplehorn Insect Collection, United States of America
OSU 640403	KG110515-02B	Mycetomollerius	mikromelanos	gyne	NA	The Ohio State University Museum of Biological Diversity Triplehorn Insect Collection, United States of America
OSU 640404	KG110515-02B	Mycetomollerius	mikromelanos	gyne	NA	The Ohio State University Museum of Biological Diversity Triplehorn Insect Collection, United States of America
